# Supplementary material for: Regulatory T Cell Responses in Participants with Type 1 Diabetes after a Single Dose of Interleukin-2: A Non-Randomised, Open Label, Adaptive Dose-Finding Trial
Source: PubMed Central journal article supplement (PMC5058548; doi:10.1371/journal.pmed.1002139), 2016-10-11

## S2 analysis

Title: Primary endpoint - Fitted models and their parameters

Number: 3.10

Population: Evaluable

| Model     | a (SE)         | b (SE)        | c (SE)         | d (SE)         | Dose P-value | Deviance | AIC     | Residual Error |
|-----------|----------------|---------------|----------------|----------------|--------------|----------|---------|----------------|
| Linear    | 0.090 (0.021)  | 0.195 (0.038) |                |                | 1.0144e-05   | 0.297    | -73.588 | 0.090          |
| Quadratic | 0.070 (0.026)  | 0.311 (0.102) | -0.091 (0.075) |                | 3.2341e-05   | 0.285    | -73.186 | 0.089          |
| Emax      | 0.068 (0.031)  | 0.360 (0.214) | 1.512 (1.978)  |                | 3.3965e-05   | 0.286    | -73.080 | 0.089          |
| Cubic     | 0.074 (0.033)  | 0.256 (0.274) | 0.022 (0.522)  | -0.053 (0.242) | 0.00013872   | 0.284    | -71.239 | 0.090          |
| Logistic  | -0.039 (0.505) | 0.383 (0.595) | 0.309 (0.900)  | 0.366 (0.611)  | 0.00014077   | 0.285    | -71.206 | 0.090          |
| Emax4     | 0.074 (0.055)  | 0.419 (0.673) | 1.022 (3.574)  | 0.174 (1.463)  | 0.00014814   | 0.286    | -71.088 | 0.090          |

Title: Primary endpoint - Predicted dose estimates

Number: 3.11

Population: Evaluable

| <b>Model</b> | <b>Estimate (SE) - 10% Target</b> | <b>95% CI - 10% Target</b> | <b>Estimate (SE) - 20% Target</b> | <b>95% CI - 20% Target</b> |
|--------------|-----------------------------------|----------------------------|-----------------------------------|----------------------------|
| Linear       | 0.054 (0.102)                     | -0.145 - 0.253             | 0.567 (0.080)                     | 0.411 - 0.723              |
| Quadratic    | 0.099 (0.068)                     | -0.034 - 0.232             | 0.487 (0.087)                     | 0.317 - 0.658              |
| Emax         | 0.095 (0.062)                     | -0.026 - 0.217             | 0.486 (0.098)                     | 0.293 - 0.679              |
| Cubic        | 0.101 (0.078)                     | -0.052 - 0.254             | 0.497 (0.092)                     | 0.316 - 0.678              |
| Logistic     | 0.104 (0.086)                     | -0.066 - 0.273             | 0.494 (0.091)                     | 0.316 - 0.673              |
| Emax4        | 0.101 (0.098)                     | -0.091 - 0.293             | 0.487 (0.097)                     | 0.297 - 0.678              |

Title: Scatter plot with fitted models illustrated

Number: 3.13

Population: Evaluable

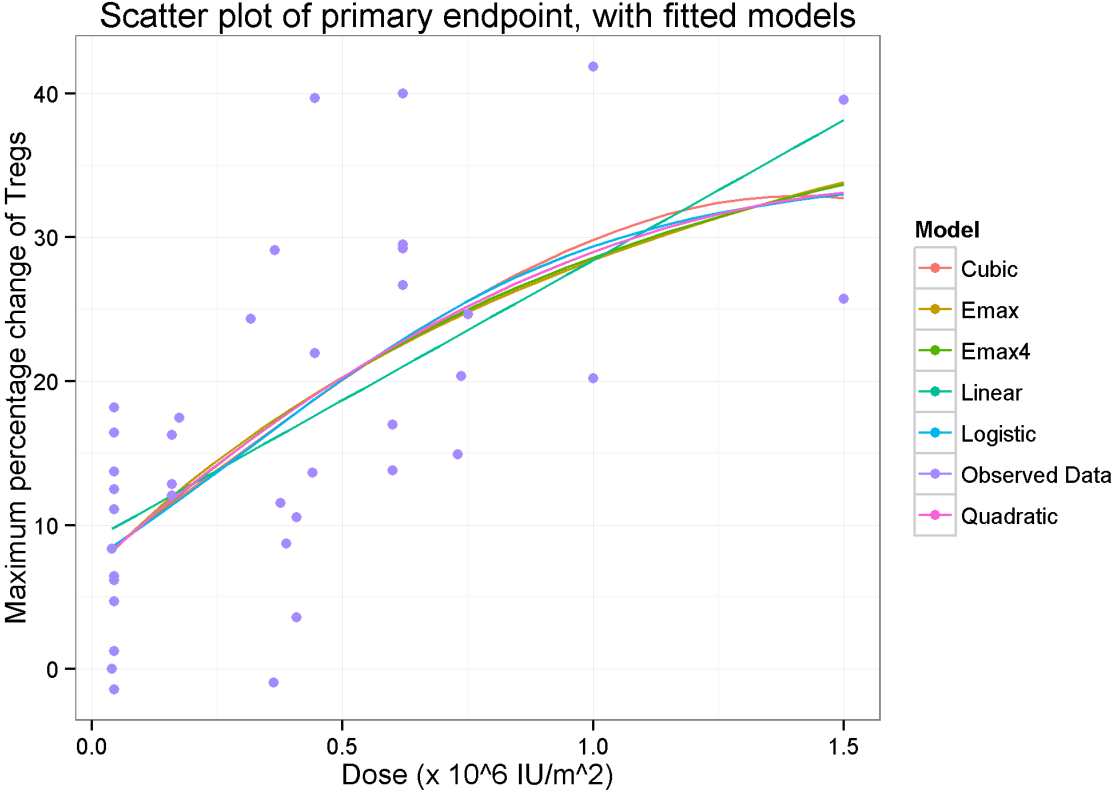

Supplement: pmed.1002139.s002.pdf [file pmed.1002139.s002.pdf]
