# Supplementary material for: Regulatory T Cell Responses in Participants with Type 1 Diabetes after a Single Dose of Interleukin-2: A Non-Randomised, Open Label, Adaptive Dose-Finding Trial
Source: PubMed Central journal article supplement (PMC5058548; doi:10.1371/journal.pmed.1002139), 2016-10-11

## S1 analysis Primary Endpoint Analysis Population

### Primary Endpoint Analysis

#### Analysis Population

The primary endpoint defined as the maximum percentage change observed over the profile of 7 days for the 40 individuals of the analysis population. The average value of the primary endpoint was 18.35 (0.36) and ranged between -1.408 and 72.5.

Three of the tested models converged:

- i) Linear Model:  $y = 0.102 (0.0295) + 0.197 (0.0532) \text{ dose}$
- ii) Quadratic Model:  $y = 0.0707 (0.0366) + 0.383 (0.141) \text{ dose} - 0.146 (0.102) \text{ dose}^2$
- iii) Cubic Model:  $y = 0.0586 (0.0448) + 0.548 (0.372) \text{ dose} - 0.485 (0.711) \text{ dose}^2 + 0.159 (0.331) \text{ dose}^3$

The estimated doses of the three models that achieve the two selected targets of 10% and 20% are:

| Model/ Target | 10%             | 20%            |
|---------------|-----------------|----------------|
| Linear        | -0.0123 (0.152) | 0.496 (0.103)  |
| Quadratic     | 0.0788 (0.0807) | 0.398 (0.0889) |
| Cubic         | 0.0813 (0.0618) | 0.358 (0.123)  |

Scatter plot of primary endpoint, with fitted models

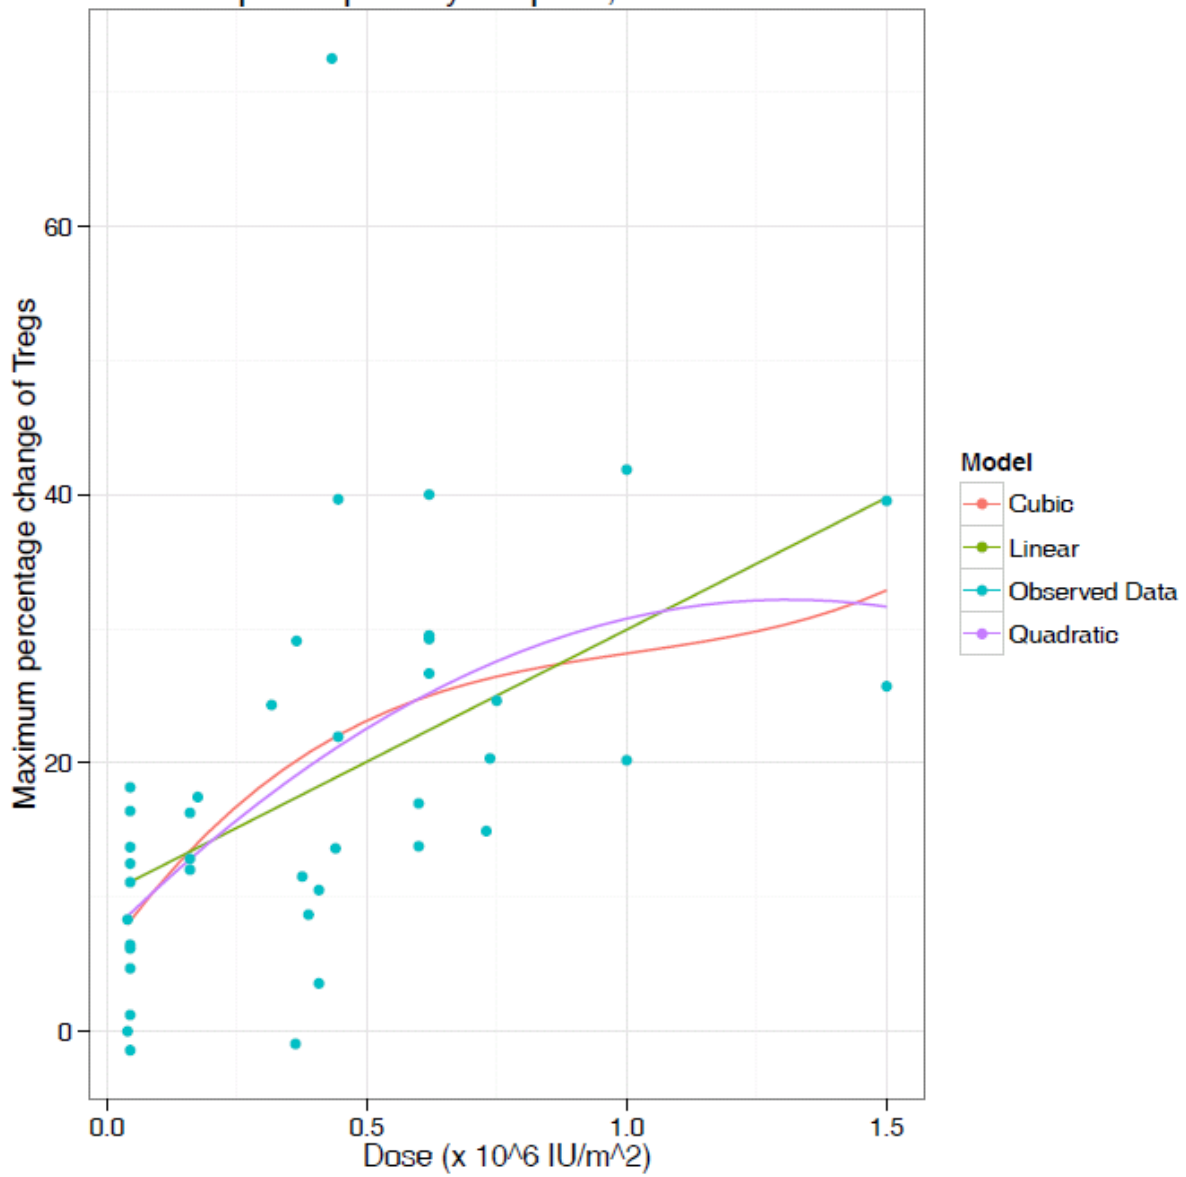

Supplement: pmed.1002139.s001.pdf [file pmed.1002139.s001.pdf]
