# Supplementary material for: Regulatory T Cell Responses in Participants with Type 1 Diabetes after a Single Dose of Interleukin-2: A Non-Randomised, Open Label, Adaptive Dose-Finding Trial
Source: PubMed Central journal article supplement (PMC5058548; doi:10.1371/journal.pmed.1002139), 2016-10-11
Supplement: pmed.1002139.s015.pdf [file pmed.1002139.s015.pdf]

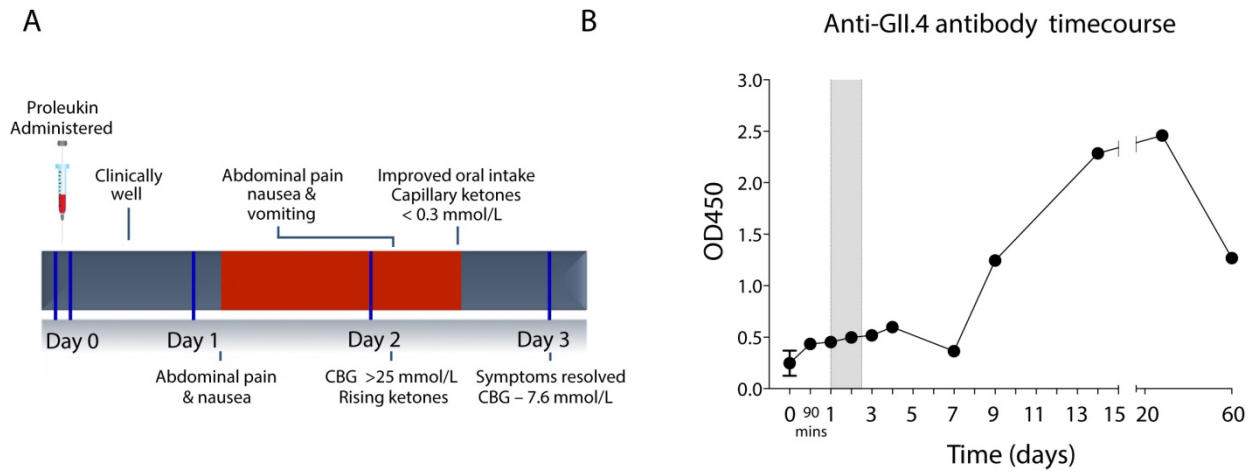

**S2 Fig. Clinical course and anti-norovirus GII.4 antibody response of Norovirus infected participant.**

(A) Clinical course, development and conservative management of acute gastroenteritis. Blue lines indicate the blood sampling timepoints. Shaded red box indicates period of acute gastroenteritis symptoms. (B) Serum IgG titers against NoV GII.4 Dijon-strain virus-like particles (VLP) through the trial period in the participant with a gastrointestinal infection. The shaded area indicates the period of reported gastroenteritis.
