# Supplementary material for: Regulatory T Cell Responses in Participants with Type 1 Diabetes after a Single Dose of Interleukin-2: A Non-Randomised, Open Label, Adaptive Dose-Finding Trial
Source: PubMed Central journal article supplement (PMC5058548; doi:10.1371/journal.pmed.1002139), 2016-10-11
Supplement: pmed.1002139.s016.pdf [file pmed.1002139.s016.pdf]

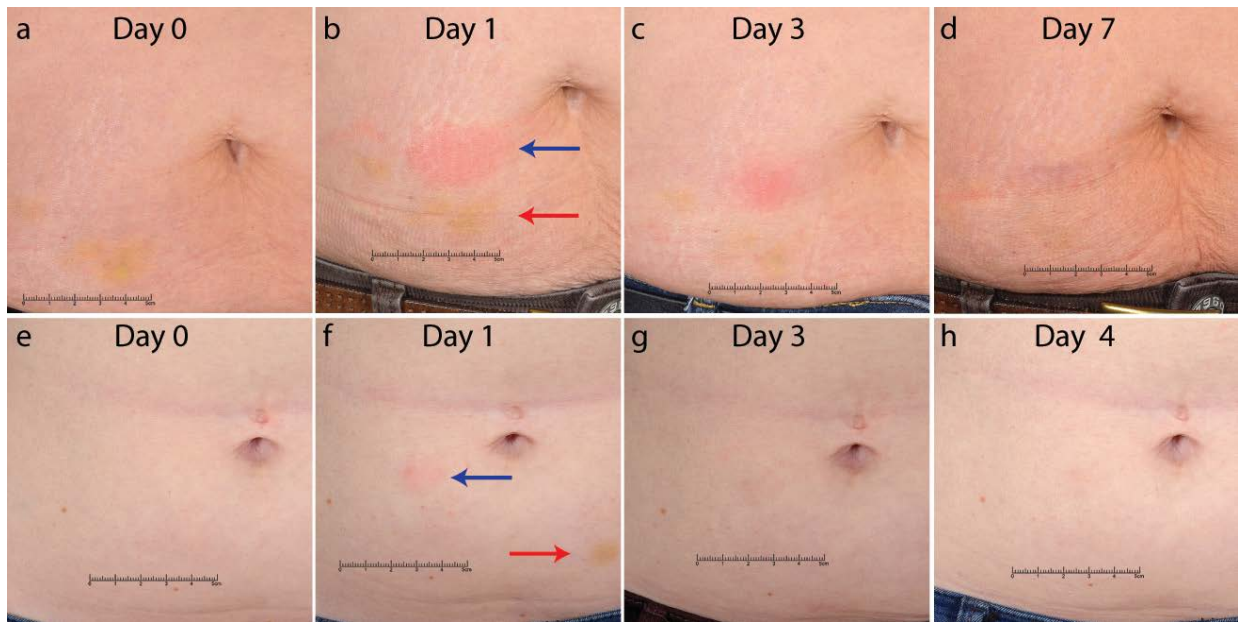

**S3 Fig. Injection site reactions.** Almost all participants had a delayed injection site reaction that was observed on day 1. Representative clinical photographs of the abdomens of two female participants showing typical injection site reactions through time of a participant administered  $0.620 \times 10^6$  IU/m<sup>2</sup> of Proleukin (a-d) and  $0.045 \times 10^6$  IU/m<sup>2</sup> (e-h). The site reaction consisted of non-itchy erythematous rash followed by the formation of a palpable subcutaneous nodule. The blue arrows mark the site reaction; red arrows mark the ecchymosis from subcutaneous insulin administration; ruler 0-5 cm.
