# Supplementary material for: Regulatory T Cell Responses in Participants with Type 1 Diabetes after a Single Dose of Interleukin-2: A Non-Randomised, Open Label, Adaptive Dose-Finding Trial
Source: PubMed Central journal article supplement (PMC5058548; doi:10.1371/journal.pmed.1002139), 2016-10-11
Supplement: pmed.1002139.s017.pdf [file pmed.1002139.s017.pdf]

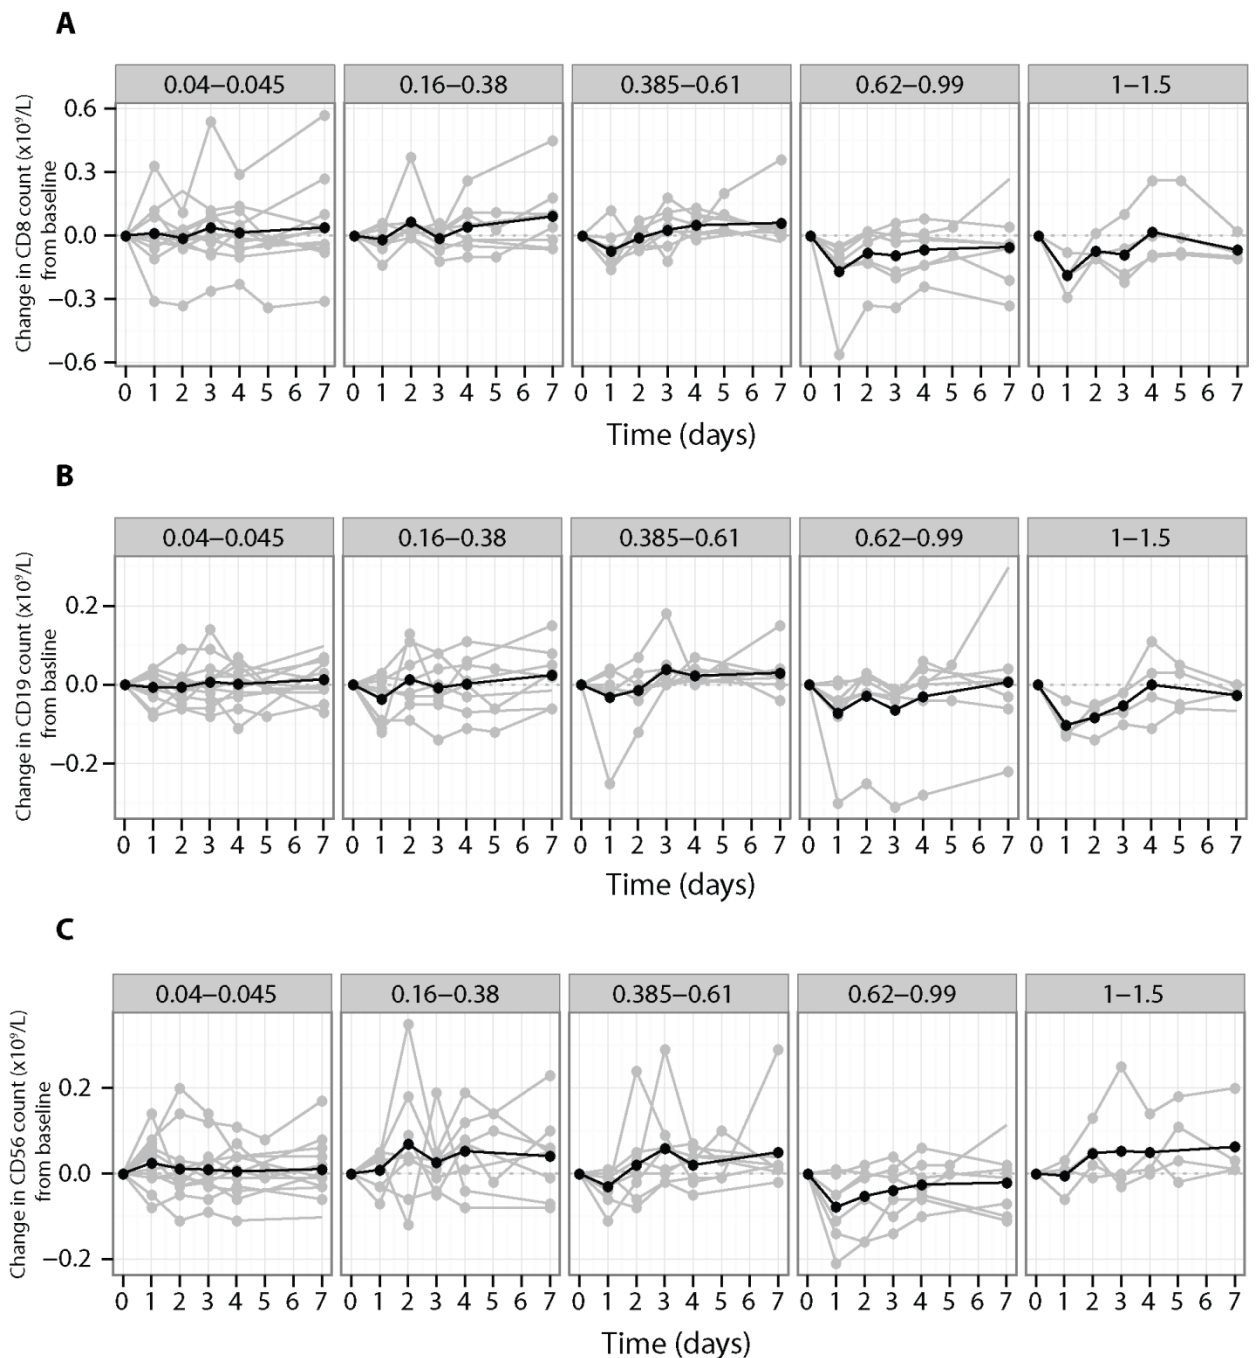

**S4 Fig. Changes in CD8<sup>+</sup> T, B and NK cell counts in response to Proleukin. (A)** CD8<sup>+</sup> T cells in blood have a dose-dependent decrease in number in response to treatment on day 0. **(B)** B cell counts also decrease recovering to pretreatment ranges by day 4. **(C)** Increase in total NK counts at the two highest doses
