# Supplementary material for: Regulatory T Cell Responses in Participants with Type 1 Diabetes after a Single Dose of Interleukin-2: A Non-Randomised, Open Label, Adaptive Dose-Finding Trial
Source: PubMed Central journal article supplement (PMC5058548; doi:10.1371/journal.pmed.1002139), 2016-10-11
Supplement: pmed.1002139.s018.pdf [file pmed.1002139.s018.pdf]

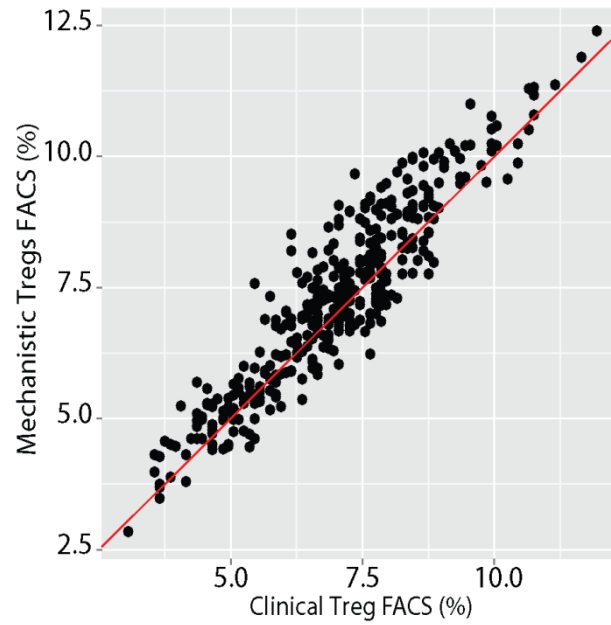

**S5 Fig. Correlation between clinical and mechanistic FACS analysis of Tregs.** The measurement of Tregs as a percentage of CD4<sup>+</sup> T cells between the two independent Treg FACS assays from days 1-7 (Pearson's correlation coefficient= 0.93; t-test  $p < 2.2 \times 10^{-16}$ ; N=377).
