# Supplementary material for: Regulatory T Cell Responses in Participants with Type 1 Diabetes after a Single Dose of Interleukin-2: A Non-Randomised, Open Label, Adaptive Dose-Finding Trial
Source: PubMed Central journal article supplement (PMC5058548; doi:10.1371/journal.pmed.1002139), 2016-10-11
Supplement: pmed.1002139.s025.pdf [file pmed.1002139.s025.pdf]

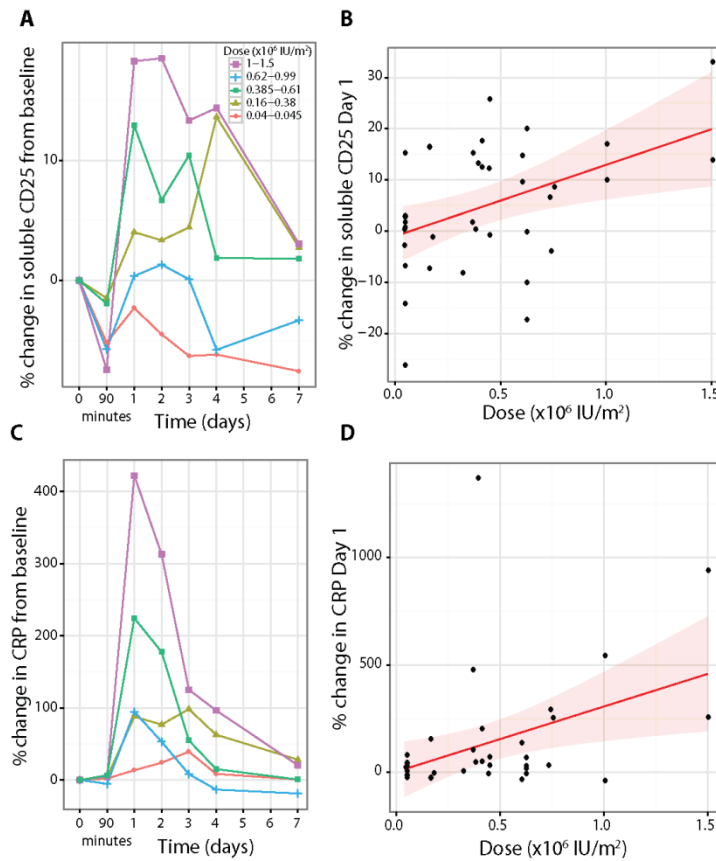

**S12 Fig. Soluble CD25 and C-reactive protein responses. (A and B)** Soluble CD25 increased linearly with dose on day 1 (average baseline  $2.5 \times 10^3$  pg/ml (0.09; 1.55 – 4.07); N=38). **(C and D)** Acute phase protein C-reactive protein (CRP) showed a linear dose response on day 1 (average baseline  $2.98 \times 10^6$  pg/ml (0.78; 0.12-23.25); N=37). [The shaded area presents the 95% confidence interval of the fitted models]
