# Supplementary material for: Regulatory T Cell Responses in Participants with Type 1 Diabetes after a Single Dose of Interleukin-2: A Non-Randomised, Open Label, Adaptive Dose-Finding Trial
Source: PubMed Central journal article supplement (PMC5058548; doi:10.1371/journal.pmed.1002139), 2016-10-11
Supplement: pmed.1002139.s026.pdf [file pmed.1002139.s026.pdf]

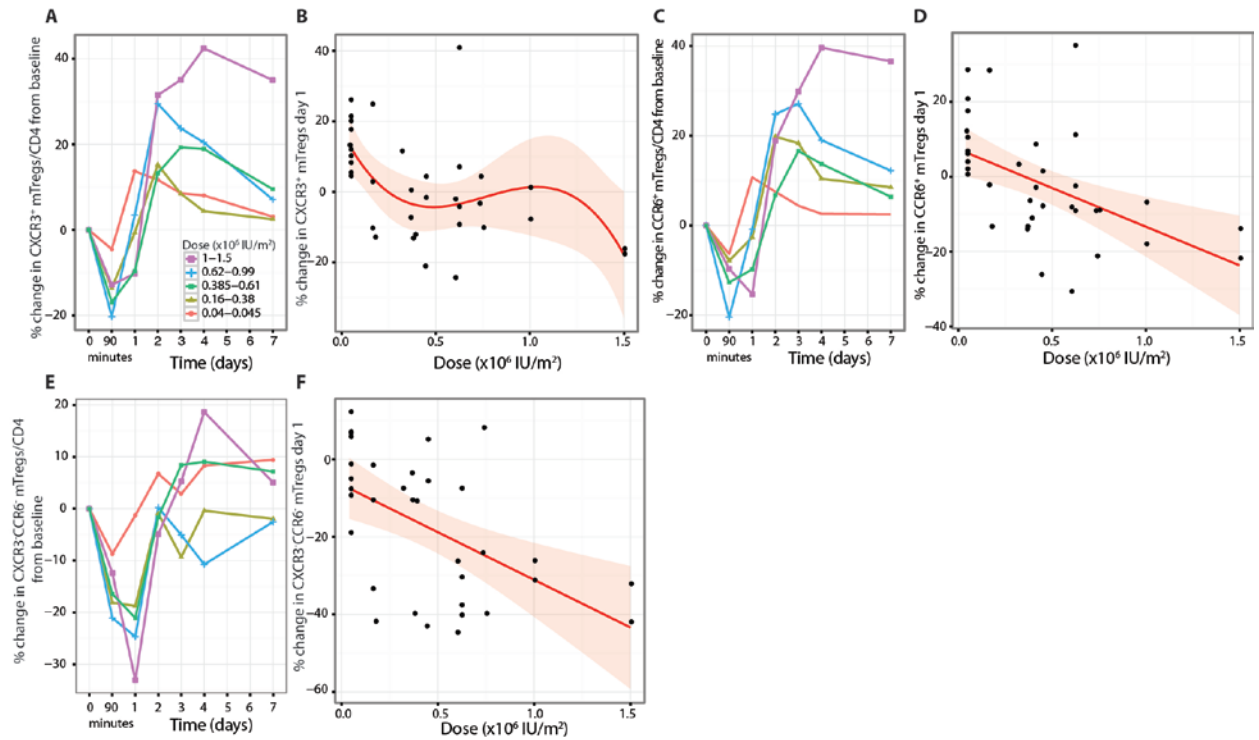

**S13 Fig. Changes in frequency of CXCR3<sup>+</sup>,CCR6<sup>+</sup> and CXCR3<sup>+</sup>CCR6<sup>-</sup> memory Tregs. (A and B)** Rapid dose-dependent reduction in the frequency of CXCR3<sup>+</sup> mTregs followed by an increase (average baseline mTregs (% CD4 T cells) 2.04% (0.12; 0.94-3.69) N = 35) induced by Proleukin. **(C)** A similar reduction in the percentage of CCR6<sup>+</sup> mTregs was seen after a dose of Proleukin followed by a sustained increase over several days. **(D)** The decrease in CCR6<sup>+</sup> mTregs was dose dependent with a linear response on day 1 (average baseline CCR6<sup>+</sup> mTreg (out of % CD4 T cells) 3.0% (0.14; 1.7 - 5.84) N=37). **(E and F)** CXCR3<sup>+</sup>CCR6<sup>-</sup> mTregs also had a dose-dependent decline in frequency in blood following treatment with Proleukin (average baseline 0.82% (0.05; 0.36-1.54) N = 34). [The shared area presents the 95% confidence interval of the fitted models]
