# Supplementary material for: Regulatory T Cell Responses in Participants with Type 1 Diabetes after a Single Dose of Interleukin-2: A Non-Randomised, Open Label, Adaptive Dose-Finding Trial
Source: PubMed Central journal article supplement (PMC5058548; doi:10.1371/journal.pmed.1002139), 2016-10-11
Supplement: pmed.1002139.s030.pdf [file pmed.1002139.s030.pdf]

# Interim Report DILT1D Trial

Simon Bond

January 29, 2014

## 1 Individual Patient Profiles

The patient profiles are shown overlaid in figure 1, and split up by dose in figure 2.

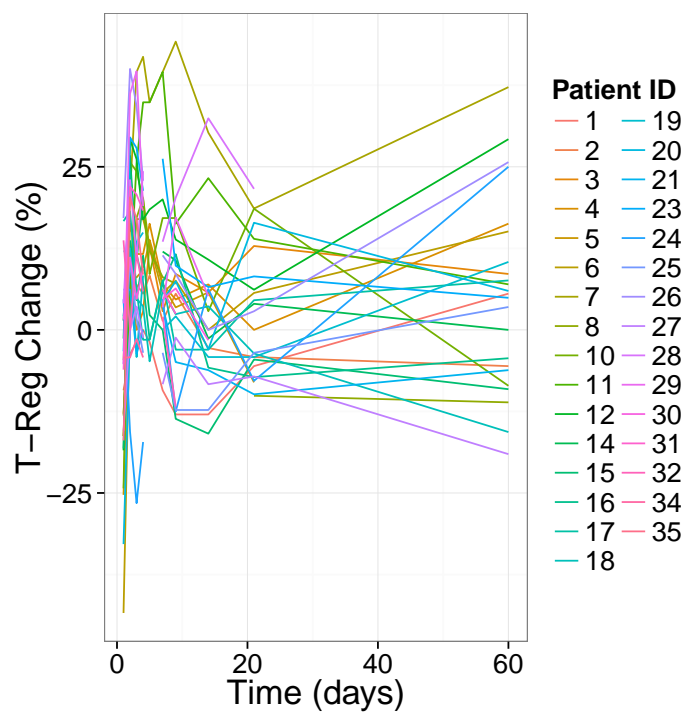

Figure 1: Spaghetti plot of all profiles

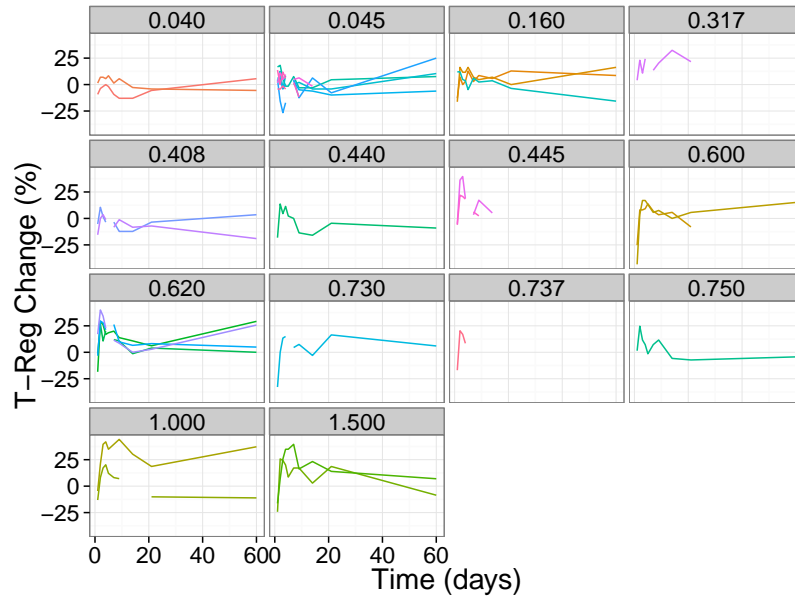

Figure 2: Profiles separated by dose ( $\times 10^6 IU/m^2$ )

## 2 Summary of dose and maximum Treg values

We have a plot of sequence of doses given in order in figure 3. A scatter plot of dose versus maximum T-reg change is given in figure 4

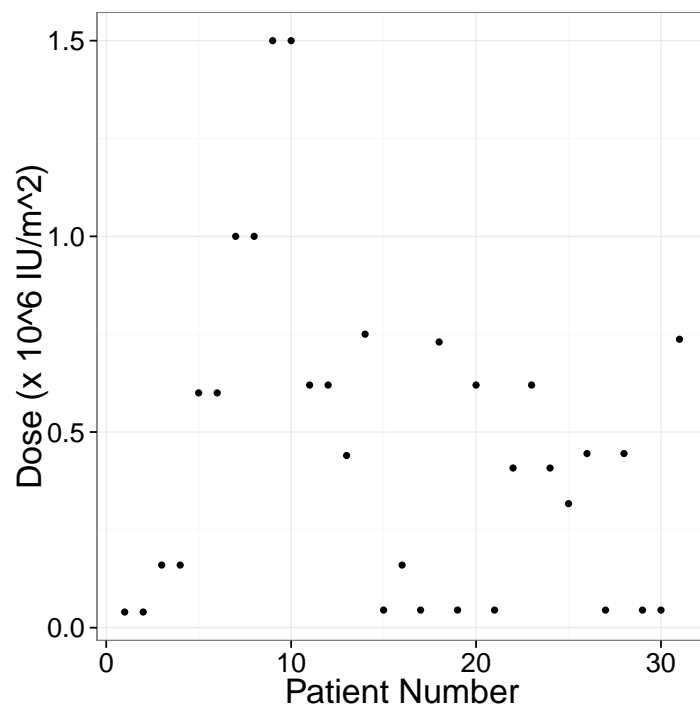

Figure 3: Dose Sequence

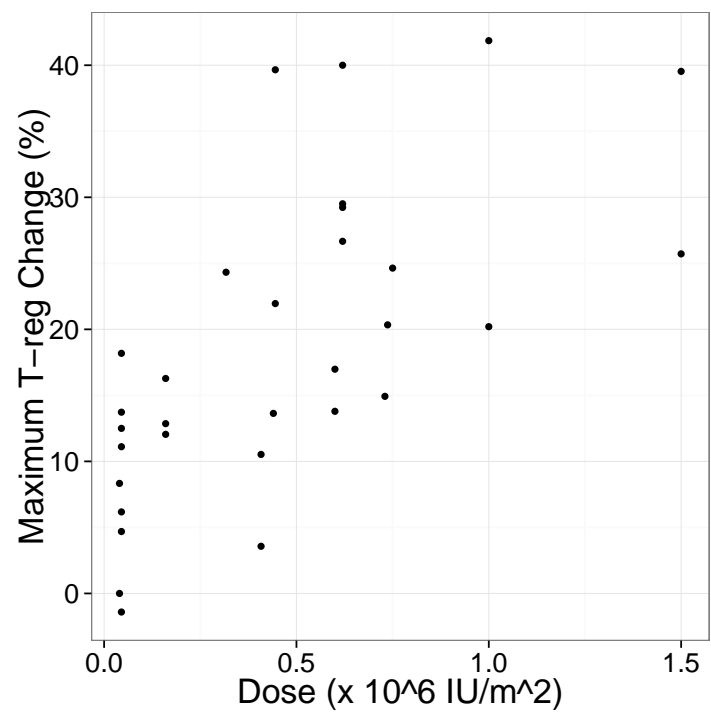

Figure 4: Scatter Plot of Dose versus Maximum T-reg change

### 3 Model Fitting and Dose Choice

The targets are set as 10% and 20%. Fitted models are estimated under a variety of different modelling assumptions

The following models did not converge: logistic, Emax4.

Figure 5 shows all the fitted models' predicted values overlaid onto the scatter plot of the raw data. The 95% confidence bands for the individual models are shown in figure 6.

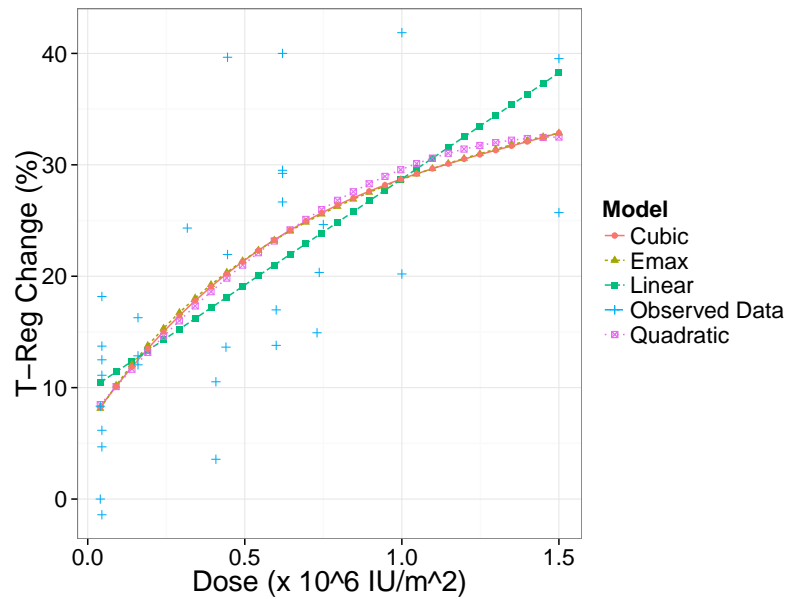

Figure 5: Fitted Values for the convergent Models

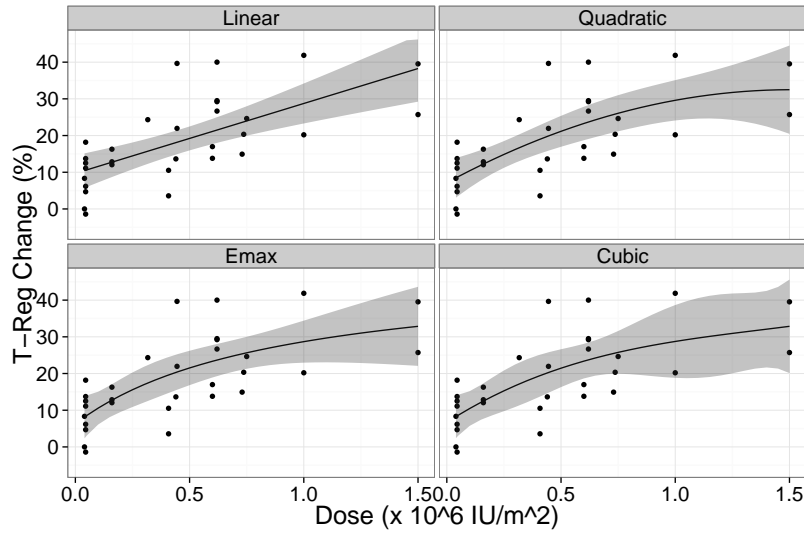

Figure 6: Model predictions with 95% pointwise confidence intervals

Figure 6 shows the uncertainty in the models about the population average *expected* value. It does not incorporate between-patient variability.

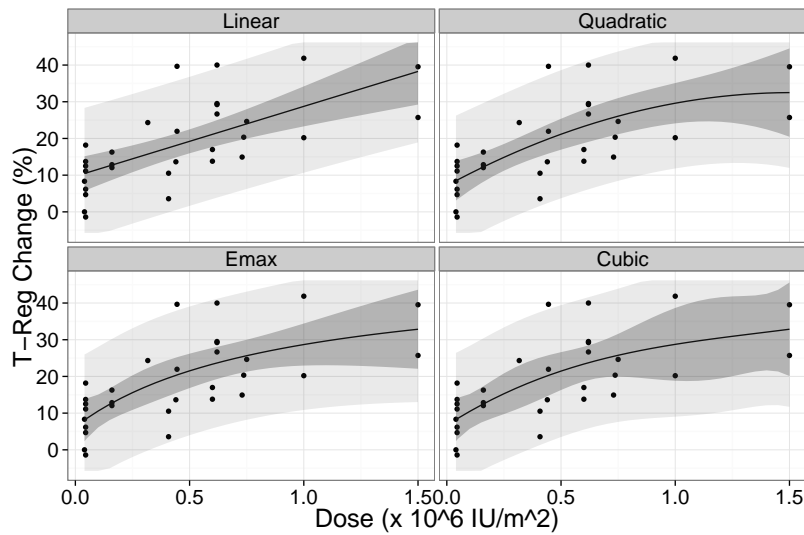

Figure 7: Patient-level predictions with 95% pointwise confidence intervals

Figure 7 shows the uncertainty in the models about the population average

*expected* value in the dark gray, identical to figure 6. The light gray bands add on the extra variability due to between-patient variability. If we were to dose a new patient, we are 95% certain their outcome will lie in the light, or dark, gray region. The values shown in figure 7 are tabulated below in table 1

| Model     | Dose | Estimate | CI for Mean Value |       | CI for a Patient |       |
|-----------|------|----------|-------------------|-------|------------------|-------|
|           |      |          | lower             | upper | lower            | upper |
| Linear    | 0.04 | 0.10     | 0.06              | 0.15  | -0.06            | 0.28  |
|           | 0.05 | 0.11     | 0.06              | 0.15  | -0.06            | 0.29  |
|           | 0.40 | 0.17     | 0.14              | 0.21  | 0.00             | 0.35  |
|           | 0.45 | 0.18     | 0.15              | 0.22  | 0.01             | 0.36  |
|           | 0.50 | 0.19     | 0.16              | 0.22  | 0.02             | 0.37  |
|           | 0.55 | 0.20     | 0.17              | 0.23  | 0.03             | 0.38  |
| Quadratic | 0.04 | 0.08     | 0.03              | 0.14  | -0.06            | 0.26  |
|           | 0.05 | 0.09     | 0.04              | 0.14  | -0.06            | 0.27  |
|           | 0.40 | 0.19     | 0.15              | 0.23  | 0.01             | 0.36  |
|           | 0.45 | 0.20     | 0.16              | 0.24  | 0.03             | 0.37  |
|           | 0.50 | 0.21     | 0.17              | 0.25  | 0.04             | 0.39  |
|           | 0.55 | 0.22     | 0.18              | 0.27  | 0.05             | 0.40  |
| Emax      | 0.04 | 0.08     | 0.02              | 0.14  | -0.06            | 0.26  |
|           | 0.05 | 0.09     | 0.03              | 0.14  | -0.06            | 0.26  |
|           | 0.40 | 0.19     | 0.15              | 0.24  | 0.02             | 0.37  |
|           | 0.45 | 0.21     | 0.16              | 0.25  | 0.03             | 0.38  |
|           | 0.50 | 0.22     | 0.17              | 0.26  | 0.04             | 0.39  |
|           | 0.55 | 0.22     | 0.18              | 0.27  | 0.05             | 0.40  |
| Cubic     | 0.04 | 0.08     | 0.02              | 0.14  | -0.06            | 0.26  |
|           | 0.05 | 0.09     | 0.03              | 0.14  | -0.06            | 0.27  |
|           | 0.40 | 0.19     | 0.13              | 0.25  | 0.01             | 0.37  |
|           | 0.45 | 0.20     | 0.15              | 0.26  | 0.02             | 0.38  |
|           | 0.50 | 0.21     | 0.16              | 0.27  | 0.03             | 0.39  |
|           | 0.55 | 0.22     | 0.18              | 0.27  | 0.05             | 0.40  |

Table 1: Modelling Uncertainty

## 4 Residual Plots for the fitted Models

Standard residual plots in figures 8, 9.

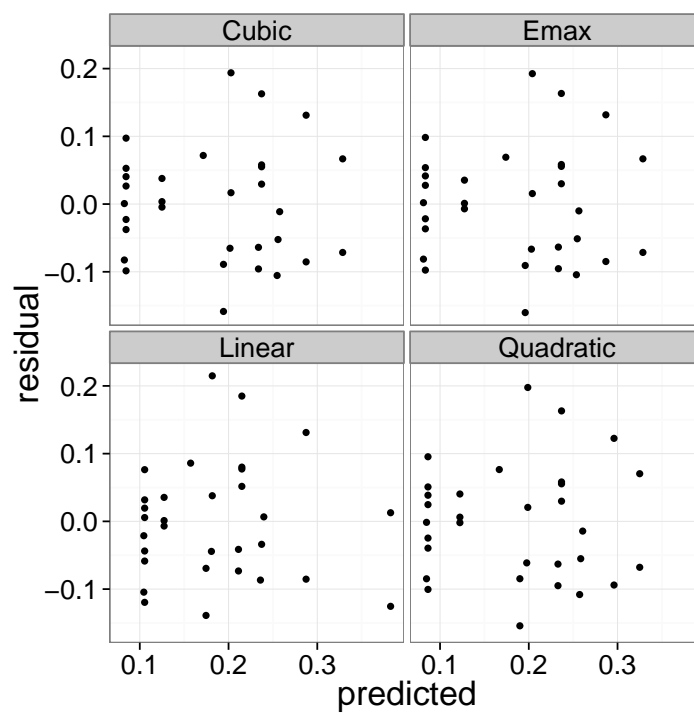

Figure 8: Residual versus Predicted Value



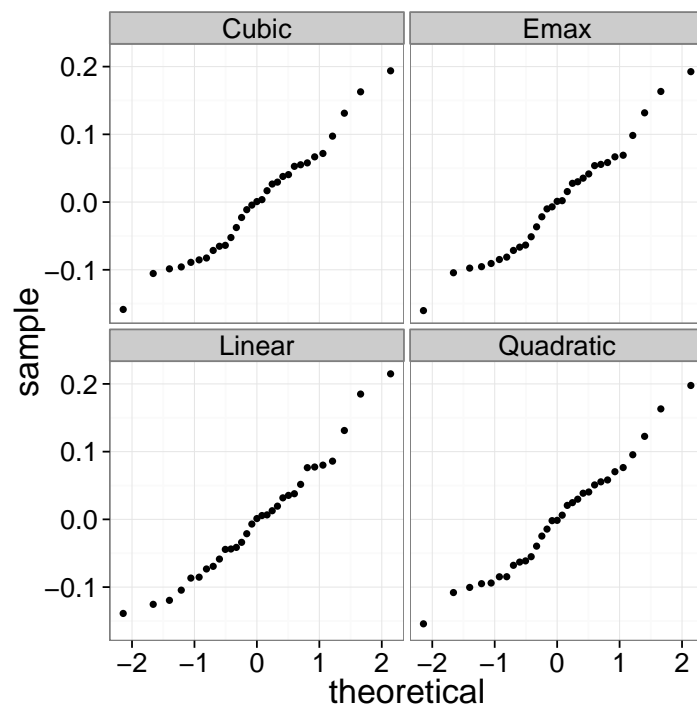

Figure 9: Quantile-Quantile Plot for Residuals

## 5 Details of Models and Estimated Target Doses

The fitted model details and predicted targets are summarised in table 2.

Table 2: Table of Predicted Target Doses, 95% C.I. and Goodness-of-Fit measures

| Model            | Target 1        |                | Target 2       |              | Deviance | AIC   |
|------------------|-----------------|----------------|----------------|--------------|----------|-------|
|                  | Estimate (SE)   | 95% C.I.       | Estimate (SE)  | 95% C.I.     |          |       |
| linear           | 0.0162 (0.124)  | -0.227, 0.260  | 0.541 (0.0850) | 0.375, 0.708 | 0.226    | -58.6 |
| quadratic        | 0.0874 (0.0734) | -0.0564, 0.231 | 0.450 (0.0834) | 0.286, 0.613 | 0.210    | -58.8 |
| E <sub>max</sub> | 0.0851 (0.0575) | -0.0277, 0.198 | 0.426 (0.109)  | 0.212, 0.641 | 0.210    | -58.9 |
| cubic            | 0.0871 (0.0659) | -0.0420, 0.216 | 0.433 (0.120)  | 0.198, 0.668 | 0.210    | -56.9 |

## 6 Dosing

- There are patients currently in the study on these doses: 0.175.
- The number of doses to be chosen is: 1.
- The doses must lie between 0.045 and 1.5
- The target levels are: 0.1, 0.2

The recommended dose for each of the convergent models is given in table 3

Table 3: Recommended Doses by Model

| Model            | Recommended Dose(s) |
|------------------|---------------------|
| linear           | 1.50                |
| quadratic        | 0.0450              |
| E <sub>max</sub> | 0.0450              |
| cubic            | 0.365               |

Table 4: Sensitivity Analysis to Dose Choice

|                  | Recommended Doses | Decrease in CR Area (%) |           |                  |       |
|------------------|-------------------|-------------------------|-----------|------------------|-------|
|                  |                   | linear                  | quadratic | E <sub>max</sub> | cubic |
| linear           | 1.500             | 10.6                    | 0.9       | 1.5              | 0.0   |
| quadratic        | 0.045             | 3.2                     | 4.2       | 4.6              | 4.5   |
| E <sub>max</sub> | 0.045             | 3.2                     | 4.2       | 4.6              | 4.5   |
| cubic            | 0.365             | 1.7                     | 2.1       | 3.6              | 4.8   |

## 7 Complete R Estimation Details

The output summarising the fitted models is given below

```

$linear
$fit
Nonlinear regression model
  model: y ~ f(dose, a, b)
  data: data
        a      b
0.09691 0.19046
residual sum-of-squares: 0.2261

Number of iterations to convergence: 1
Achieved convergence tolerance: 6.218e-17

$model
[1] "linear"

$fitSummary

Formula: y ~ f(dose, a, b)

Parameters:
  Estimate Std. Error t value Pr(>|t|)
a  0.09691    0.02412   4.017 0.000382 ***
b  0.19046    0.03958   4.812 4.28e-05 ***
---
Signif. codes:  0 '***' 0.001 '**' 0.01 '*' 0.05 '.' 0.1 ' ' 1

Residual standard error: 0.0883 on 29 degrees of freedom

Number of iterations to convergence: 1
Achieved convergence tolerance: 6.218e-17

```

\$dhat

0.01622152 0.54125766

\$dhatCov

```
          [,1]      [,2]
[1,] 0.01540853 0.005363680
[2,] 0.00536368 0.007224569
```

\$CurrentDose

[1] 0.175

\$NextDose

[1] 1.5

\$target

[1] 0.1 0.2

\$data

|    | Group.1 | patid | baseTreg | dose  | time | treg | id | Dtreg     |
|----|---------|-------|----------|-------|------|------|----|-----------|
| 1  | 1       | 1     | 5.4      | 0.040 | 7    | 5.4  | 1  | 0.000000  |
| 2  | 2       | 2     | 7.2      | 0.040 | 7    | 7.8  | 7  | 8.333333  |
| 3  | 3       | 3     | 7.0      | 0.160 | 7    | 7.9  | 8  | 12.857143 |
| 4  | 4       | 4     | 4.3      | 0.160 | 7    | 5.0  | 9  | 16.279070 |
| 5  | 5       | 5     | 8.7      | 0.600 | 7    | 9.9  | 10 | 13.793103 |
| 6  | 6       | 6     | 5.3      | 0.600 | 7    | 6.2  | 11 | 16.981132 |
| 7  | 7       | 7     | 4.3      | 1.000 | 7    | 6.1  | 12 | 41.860465 |
| 8  | 8       | 8     | 9.9      | 1.000 | 7    | 11.9 | 13 | 20.202020 |
| 9  | 10      | 10    | 7.0      | 1.500 | 7    | 8.8  | 15 | 25.714286 |
| 10 | 11      | 11    | 4.3      | 1.500 | 7    | 6.0  | 16 | 39.534884 |
| 11 | 12      | 12    | 6.5      | 0.620 | 7    | 8.4  | 17 | 29.230769 |
| 12 | 14      | 14    | 7.5      | 0.620 | 7    | 9.5  | 19 | 26.666667 |
| 13 | 15      | 15    | 4.4      | 0.440 | 7    | 5.0  | 20 | 13.636364 |
| 14 | 16      | 16    | 6.9      | 0.750 | 7    | 8.6  | 21 | 24.637681 |
| 15 | 17      | 17    | 6.6      | 0.045 | 7    | 7.8  | 22 | 18.181818 |
| 16 | 18      | 18    | 8.3      | 0.160 | 7    | 9.3  | 23 | 12.048193 |
| 17 | 19      | 19    | 4.8      | 0.045 | 7    | 5.4  | 24 | 12.500000 |
| 18 | 20      | 20    | 6.7      | 0.730 | 7    | 7.7  | 25 | 14.925373 |
| 19 | 21      | 21    | 8.1      | 0.045 | 7    | 8.6  | 26 | 6.172840  |
| 20 | 23      | 23    | 6.1      | 0.620 | 7    | 7.9  | 28 | 29.508197 |
| 21 | 24      | 24    | 6.4      | 0.045 | 7    | 6.7  | 29 | 4.687500  |
| 22 | 25      | 25    | 5.7      | 0.408 | 7    | 6.3  | 30 | 10.526316 |
| 23 | 26      | 26    | 3.5      | 0.620 | 7    | 4.9  | 31 | 40.000000 |
| 24 | 27      | 27    | 8.4      | 0.408 | 7    | 8.7  | 32 | 3.571429  |
| 25 | 28      | 28    | 7.4      | 0.317 | 7    | 9.2  | 33 | 24.324324 |

|    |    |    |     |       |   |      |    |           |
|----|----|----|-----|-------|---|------|----|-----------|
| 26 | 29 | 29 | 5.8 | 0.445 | 7 | 8.1  | 34 | 39.655172 |
| 27 | 30 | 30 | 6.3 | 0.045 | 7 | 7.0  | 36 | 11.111111 |
| 28 | 31 | 31 | 8.2 | 0.445 | 7 | 10.0 | 37 | 21.951220 |
| 29 | 32 | 32 | 5.1 | 0.045 | 7 | 5.8  | 38 | 13.725490 |
| 30 | 34 | 34 | 7.1 | 0.045 | 7 | 7.0  | 40 | -1.408451 |
| 31 | 35 | 35 | 5.9 | 0.737 | 7 | 7.1  | 41 | 20.338983 |

```

dosetext y
1 0.04 x 10^6 IU/m^2 0.0000000
2 0.04 x 10^6 IU/m^2 0.08333333
3 0.16 x 10^6 IU/m^2 0.12857143
4 0.16 x 10^6 IU/m^2 0.16279070
5 0.6 x 10^6 IU/m^2 0.13793103
6 0.6 x 10^6 IU/m^2 0.16981132
7 1 x 10^6 IU/m^2 0.41860465
8 1 x 10^6 IU/m^2 0.20202020
9 1.5 x 10^6 IU/m^2 0.25714286
10 1.5 x 10^6 IU/m^2 0.39534884
11 0.62 x 10^6 IU/m^2 0.29230769
12 0.62 x 10^6 IU/m^2 0.26666667
13 0.44 x 10^6 IU/m^2 0.13636364
14 0.75 x 10^6 IU/m^2 0.24637681
15 0.045 x 10^6 IU/m^2 0.18181818
16 0.16 x 10^6 IU/m^2 0.12048193
17 0.045 x 10^6 IU/m^2 0.12500000
18 0.73 x 10^6 IU/m^2 0.14925373
19 0.045 x 10^6 IU/m^2 0.06172840
20 0.62 x 10^6 IU/m^2 0.29508197
21 0.045 x 10^6 IU/m^2 0.04687500
22 0.408 x 10^6 IU/m^2 0.10526316
23 0.62 x 10^6 IU/m^2 0.40000000
24 0.408 x 10^6 IU/m^2 0.03571429
25 0.317 x 10^6 IU/m^2 0.24324324
26 0.445 x 10^6 IU/m^2 0.39655172
27 0.045 x 10^6 IU/m^2 0.11111111
28 0.445 x 10^6 IU/m^2 0.21951220
29 0.045 x 10^6 IU/m^2 0.13725490
30 0.045 x 10^6 IU/m^2 -0.01408451
31 0.737 x 10^6 IU/m^2 0.20338983

```

```

$lowDose
[1] 0.045

```

```

$hiDose
[1] 1.5

```

```

$optimResult

```

```

$optimResult$par
[1] 1.5

$optimResult$value
[1] -9.671962

$optimResult$counts
function gradient
      1      1

$optimResult$convergence
[1] 0

$optimResult$message
[1] "CONVERGENCE: NORM OF PROJECTED GRADIENT <= PGTOL"

$betaCovariance
      a      b
a 0.0005818912 -0.0007194411
b -0.0007194411 0.0015667492

$sigma
[1] 0.08830279

$f
function (dose, a, b)
{
  .value <- a + b * dose
  .grad <- array(0, c(length(.value), 2L), list(NULL, c("a",
    "b")))
  .hessian <- array(0, c(length(.value), 2L, 2L), list(NULL,
    c("a", "b"), c("a", "b")))
  .grad[, "a"] <- 1
  .grad[, "b"] <- dose
  attr(.value, "gradient") <- .grad
  attr(.value, "hessian") <- .hessian
  .value
}

$g
function (dose, a, b)
{
  .value <- a + b * dose
  .grad <- array(0, c(length(.value), 1L), list(NULL, c("dose")))
  .hessian <- array(0, c(length(.value), 1L, 1L), list(NULL,

```

```

      c("dose"), c("dose")))
    .grad[, "dose"] <- b
    attr(.value, "gradient") <- .grad
    attr(.value, "hessian") <- .hessian
    .value
  }

$Optimality
[1] "Det"

attr("class")
[1] "NextDose"

$quadratic
$fit
Nonlinear regression model
  model: y ~ f(dose, a, b, c)
  data: data
      a      b      c
0.07153 0.33557 -0.11107
residual sum-of-squares: 0.2103

Number of iterations to convergence: 1
Achieved convergence tolerance: 6.71e-17

$model
[1] "quadratic"

$fitSummary

Formula: y ~ f(dose, a, b, c)

Parameters:
  Estimate Std. Error t value Pr(>|t|)
a  0.07153   0.02943   2.431 0.02172 *
b  0.33557   0.10720   3.130 0.00406 **
c -0.11107   0.07648  -1.452 0.15755
---
Signif. codes:  0 '***' 0.001 '**' 0.01 '*' 0.05 '.' 0.1 ' ' 1

Residual standard error: 0.08666 on 28 degrees of freedom

Number of iterations to convergence: 1
Achieved convergence tolerance: 6.71e-17

```

\$dhat

0.08736582 0.44981054

\$dhatCov

```
          [,1]      [,2]
[1,] 0.005381853 0.001820379
[2,] 0.001820379 0.006955536
```

\$CurrentDose

[1] 0.175

\$NextDose

[1] 0.045

\$target

[1] 0.1 0.2

\$data

|    | Group.1 | patid | baseTreg | dose  | time | treg | id | Dtreg     |
|----|---------|-------|----------|-------|------|------|----|-----------|
| 1  | 1       | 1     | 5.4      | 0.040 | 7    | 5.4  | 1  | 0.000000  |
| 2  | 2       | 2     | 7.2      | 0.040 | 7    | 7.8  | 7  | 8.333333  |
| 3  | 3       | 3     | 7.0      | 0.160 | 7    | 7.9  | 8  | 12.857143 |
| 4  | 4       | 4     | 4.3      | 0.160 | 7    | 5.0  | 9  | 16.279070 |
| 5  | 5       | 5     | 8.7      | 0.600 | 7    | 9.9  | 10 | 13.793103 |
| 6  | 6       | 6     | 5.3      | 0.600 | 7    | 6.2  | 11 | 16.981132 |
| 7  | 7       | 7     | 4.3      | 1.000 | 7    | 6.1  | 12 | 41.860465 |
| 8  | 8       | 8     | 9.9      | 1.000 | 7    | 11.9 | 13 | 20.202020 |
| 9  | 10      | 10    | 7.0      | 1.500 | 7    | 8.8  | 15 | 25.714286 |
| 10 | 11      | 11    | 4.3      | 1.500 | 7    | 6.0  | 16 | 39.534884 |
| 11 | 12      | 12    | 6.5      | 0.620 | 7    | 8.4  | 17 | 29.230769 |
| 12 | 14      | 14    | 7.5      | 0.620 | 7    | 9.5  | 19 | 26.666667 |
| 13 | 15      | 15    | 4.4      | 0.440 | 7    | 5.0  | 20 | 13.636364 |
| 14 | 16      | 16    | 6.9      | 0.750 | 7    | 8.6  | 21 | 24.637681 |
| 15 | 17      | 17    | 6.6      | 0.045 | 7    | 7.8  | 22 | 18.181818 |
| 16 | 18      | 18    | 8.3      | 0.160 | 7    | 9.3  | 23 | 12.048193 |
| 17 | 19      | 19    | 4.8      | 0.045 | 7    | 5.4  | 24 | 12.500000 |
| 18 | 20      | 20    | 6.7      | 0.730 | 7    | 7.7  | 25 | 14.925373 |
| 19 | 21      | 21    | 8.1      | 0.045 | 7    | 8.6  | 26 | 6.172840  |
| 20 | 23      | 23    | 6.1      | 0.620 | 7    | 7.9  | 28 | 29.508197 |
| 21 | 24      | 24    | 6.4      | 0.045 | 7    | 6.7  | 29 | 4.687500  |
| 22 | 25      | 25    | 5.7      | 0.408 | 7    | 6.3  | 30 | 10.526316 |
| 23 | 26      | 26    | 3.5      | 0.620 | 7    | 4.9  | 31 | 40.000000 |
| 24 | 27      | 27    | 8.4      | 0.408 | 7    | 8.7  | 32 | 3.571429  |
| 25 | 28      | 28    | 7.4      | 0.317 | 7    | 9.2  | 33 | 24.324324 |
| 26 | 29      | 29    | 5.8      | 0.445 | 7    | 8.1  | 34 | 39.655172 |



|    |    |    |     |       |   |      |    |           |
|----|----|----|-----|-------|---|------|----|-----------|
| 27 | 30 | 30 | 6.3 | 0.045 | 7 | 7.0  | 36 | 11.111111 |
| 28 | 31 | 31 | 8.2 | 0.445 | 7 | 10.0 | 37 | 21.951220 |
| 29 | 32 | 32 | 5.1 | 0.045 | 7 | 5.8  | 38 | 13.725490 |
| 30 | 34 | 34 | 7.1 | 0.045 | 7 | 7.0  | 40 | -1.408451 |
| 31 | 35 | 35 | 5.9 | 0.737 | 7 | 7.1  | 41 | 20.338983 |

```

dosetext y
1 0.04 x 10^6 IU/m^2 0.0000000
2 0.04 x 10^6 IU/m^2 0.08333333
3 0.16 x 10^6 IU/m^2 0.12857143
4 0.16 x 10^6 IU/m^2 0.16279070
5 0.6 x 10^6 IU/m^2 0.13793103
6 0.6 x 10^6 IU/m^2 0.16981132
7 1 x 10^6 IU/m^2 0.41860465
8 1 x 10^6 IU/m^2 0.20202020
9 1.5 x 10^6 IU/m^2 0.25714286
10 1.5 x 10^6 IU/m^2 0.39534884
11 0.62 x 10^6 IU/m^2 0.29230769
12 0.62 x 10^6 IU/m^2 0.26666667
13 0.44 x 10^6 IU/m^2 0.13636364
14 0.75 x 10^6 IU/m^2 0.24637681
15 0.045 x 10^6 IU/m^2 0.18181818
16 0.16 x 10^6 IU/m^2 0.12048193
17 0.045 x 10^6 IU/m^2 0.12500000
18 0.73 x 10^6 IU/m^2 0.14925373
19 0.045 x 10^6 IU/m^2 0.06172840
20 0.62 x 10^6 IU/m^2 0.29508197
21 0.045 x 10^6 IU/m^2 0.04687500
22 0.408 x 10^6 IU/m^2 0.10526316
23 0.62 x 10^6 IU/m^2 0.40000000
24 0.408 x 10^6 IU/m^2 0.03571429
25 0.317 x 10^6 IU/m^2 0.24324324
26 0.445 x 10^6 IU/m^2 0.39655172
27 0.045 x 10^6 IU/m^2 0.11111111
28 0.445 x 10^6 IU/m^2 0.21951220
29 0.045 x 10^6 IU/m^2 0.13725490
30 0.045 x 10^6 IU/m^2 -0.01408451
31 0.737 x 10^6 IU/m^2 0.20338983

```

```

$lowDose
[1] 0.045

```

```

$hiDose
[1] 1.5

```

```

$optimResult
$optimResult$par

```

```

[1] 0.045

$optimResult$value
[1] -10.41625

$optimResult$counts
function gradient
      1      1

$optimResult$convergence
[1] 0

$optimResult$message
[1] "CONVERGENCE: NORM OF PROJECTED GRADIENT <= PGTOL"

$betaCovariance
      a      b      c
a 0.0008658801 -0.002439146 0.001336628
b -0.0024391463 0.011492711 -0.007641976
c 0.0013366279 -0.007641976 0.005849532

$sigma
[1] 0.0866613

$f
function (dose, a, b, c)
{
  .expr3 <- dose^2
  .value <- a + b * dose + c * .expr3
  .grad <- array(0, c(length(.value), 3L), list(NULL, c("a",
    "b", "c")))
  .hessian <- array(0, c(length(.value), 3L, 3L), list(NULL,
    c("a", "b", "c"), c("a", "b", "c")))
  .grad[, "a"] <- 1
  .grad[, "b"] <- dose
  .grad[, "c"] <- .expr3
  .hessian[, "c", "c"] <- 0
  attr(.value, "gradient") <- .grad
  attr(.value, "hessian") <- .hessian
  .value
}

$g
function (dose, a, b, c)
{

```

```

.value <- a + b * dose + c * dose^2
.grad <- array(0, c(length(.value), 1L), list(NULL, c("dose")))
.hessian <- array(0, c(length(.value), 1L, 1L), list(NULL,
  c("dose"), c("dose")))
.grad[, "dose"] <- b + c * (2 * dose)
.hessian[, "dose", "dose"] <- c * 2
attr(.value, "gradient") <- .grad
attr(.value, "hessian") <- .hessian
.value
}

```

```

$Optimality
[1] "Det"

```

```

attr("class")
[1] "NextDose"

```

```

$Emax

```

```

$fit

```

```

Nonlinear regression model

```

```

  model: y ~ f(dose, a, b, c)

```

```

  data: data

```

```

      a      b      c

```

```

0.06314 0.47449 0.89211

```

```

  residual sum-of-squares: 0.2097

```

```

Number of iterations to convergence: 3

```

```

Achieved convergence tolerance: 6.223e-06

```

```

$model

```

```

[1] "Emax"

```

```

$fitSummary

```

```

Formula: y ~ f(dose, a, b, c)

```

```

Parameters:

```

```

  Estimate Std. Error t value Pr(>|t|)

```

```

a  0.06314    0.03698   1.707  0.0988 .

```

```

b  0.47449    0.33953   1.397  0.1732

```

```

c  0.89211    1.07001   0.834  0.4115

```

```

---

```

```

Signif. codes:  0 '***' 0.001 '**' 0.01 '*' 0.05 '.' 0.1 ' ' 1

```

```

Residual standard error: 0.08654 on 28 degrees of freedom

```

Number of iterations to convergence: 3  
Achieved convergence tolerance: 6.223e-06

\$dhat

0.08510266 0.42627256

\$dhatCov

```
          [,1]      [,2]
[1,] 0.003310277 0.001745466
[2,] 0.001745466 0.011973825
```

\$CurrentDose

[1] 0.175

\$NextDose

[1] 0.045

\$target

[1] 0.1 0.2

\$data

|    | Group.1 | patid | baseTreg | dose  | time | treg | id | Dtreg     |
|----|---------|-------|----------|-------|------|------|----|-----------|
| 1  | 1       | 1     | 5.4      | 0.040 | 7    | 5.4  | 1  | 0.000000  |
| 2  | 2       | 2     | 7.2      | 0.040 | 7    | 7.8  | 7  | 8.333333  |
| 3  | 3       | 3     | 7.0      | 0.160 | 7    | 7.9  | 8  | 12.857143 |
| 4  | 4       | 4     | 4.3      | 0.160 | 7    | 5.0  | 9  | 16.279070 |
| 5  | 5       | 5     | 8.7      | 0.600 | 7    | 9.9  | 10 | 13.793103 |
| 6  | 6       | 6     | 5.3      | 0.600 | 7    | 6.2  | 11 | 16.981132 |
| 7  | 7       | 7     | 4.3      | 1.000 | 7    | 6.1  | 12 | 41.860465 |
| 8  | 8       | 8     | 9.9      | 1.000 | 7    | 11.9 | 13 | 20.202020 |
| 9  | 10      | 10    | 7.0      | 1.500 | 7    | 8.8  | 15 | 25.714286 |
| 10 | 11      | 11    | 4.3      | 1.500 | 7    | 6.0  | 16 | 39.534884 |
| 11 | 12      | 12    | 6.5      | 0.620 | 7    | 8.4  | 17 | 29.230769 |
| 12 | 14      | 14    | 7.5      | 0.620 | 7    | 9.5  | 19 | 26.666667 |
| 13 | 15      | 15    | 4.4      | 0.440 | 7    | 5.0  | 20 | 13.636364 |
| 14 | 16      | 16    | 6.9      | 0.750 | 7    | 8.6  | 21 | 24.637681 |
| 15 | 17      | 17    | 6.6      | 0.045 | 7    | 7.8  | 22 | 18.181818 |
| 16 | 18      | 18    | 8.3      | 0.160 | 7    | 9.3  | 23 | 12.048193 |
| 17 | 19      | 19    | 4.8      | 0.045 | 7    | 5.4  | 24 | 12.500000 |
| 18 | 20      | 20    | 6.7      | 0.730 | 7    | 7.7  | 25 | 14.925373 |
| 19 | 21      | 21    | 8.1      | 0.045 | 7    | 8.6  | 26 | 6.172840  |
| 20 | 23      | 23    | 6.1      | 0.620 | 7    | 7.9  | 28 | 29.508197 |
| 21 | 24      | 24    | 6.4      | 0.045 | 7    | 6.7  | 29 | 4.687500  |
| 22 | 25      | 25    | 5.7      | 0.408 | 7    | 6.3  | 30 | 10.526316 |

|    |    |    |     |       |   |      |    |           |
|----|----|----|-----|-------|---|------|----|-----------|
| 23 | 26 | 26 | 3.5 | 0.620 | 7 | 4.9  | 31 | 40.000000 |
| 24 | 27 | 27 | 8.4 | 0.408 | 7 | 8.7  | 32 | 3.571429  |
| 25 | 28 | 28 | 7.4 | 0.317 | 7 | 9.2  | 33 | 24.324324 |
| 26 | 29 | 29 | 5.8 | 0.445 | 7 | 8.1  | 34 | 39.655172 |
| 27 | 30 | 30 | 6.3 | 0.045 | 7 | 7.0  | 36 | 11.111111 |
| 28 | 31 | 31 | 8.2 | 0.445 | 7 | 10.0 | 37 | 21.951220 |
| 29 | 32 | 32 | 5.1 | 0.045 | 7 | 5.8  | 38 | 13.725490 |
| 30 | 34 | 34 | 7.1 | 0.045 | 7 | 7.0  | 40 | -1.408451 |
| 31 | 35 | 35 | 5.9 | 0.737 | 7 | 7.1  | 41 | 20.338983 |

|    | dosetext |                                     | y           |
|----|----------|-------------------------------------|-------------|
| 1  | 0.04     | x 10 <sup>6</sup> IU/m <sup>2</sup> | 0.0000000   |
| 2  | 0.04     | x 10 <sup>6</sup> IU/m <sup>2</sup> | 0.08333333  |
| 3  | 0.16     | x 10 <sup>6</sup> IU/m <sup>2</sup> | 0.12857143  |
| 4  | 0.16     | x 10 <sup>6</sup> IU/m <sup>2</sup> | 0.16279070  |
| 5  | 0.6      | x 10 <sup>6</sup> IU/m <sup>2</sup> | 0.13793103  |
| 6  | 0.6      | x 10 <sup>6</sup> IU/m <sup>2</sup> | 0.16981132  |
| 7  | 1        | x 10 <sup>6</sup> IU/m <sup>2</sup> | 0.41860465  |
| 8  | 1        | x 10 <sup>6</sup> IU/m <sup>2</sup> | 0.20202020  |
| 9  | 1.5      | x 10 <sup>6</sup> IU/m <sup>2</sup> | 0.25714286  |
| 10 | 1.5      | x 10 <sup>6</sup> IU/m <sup>2</sup> | 0.39534884  |
| 11 | 0.62     | x 10 <sup>6</sup> IU/m <sup>2</sup> | 0.29230769  |
| 12 | 0.62     | x 10 <sup>6</sup> IU/m <sup>2</sup> | 0.26666667  |
| 13 | 0.44     | x 10 <sup>6</sup> IU/m <sup>2</sup> | 0.13636364  |
| 14 | 0.75     | x 10 <sup>6</sup> IU/m <sup>2</sup> | 0.24637681  |
| 15 | 0.045    | x 10 <sup>6</sup> IU/m <sup>2</sup> | 0.18181818  |
| 16 | 0.16     | x 10 <sup>6</sup> IU/m <sup>2</sup> | 0.12048193  |
| 17 | 0.045    | x 10 <sup>6</sup> IU/m <sup>2</sup> | 0.12500000  |
| 18 | 0.73     | x 10 <sup>6</sup> IU/m <sup>2</sup> | 0.14925373  |
| 19 | 0.045    | x 10 <sup>6</sup> IU/m <sup>2</sup> | 0.06172840  |
| 20 | 0.62     | x 10 <sup>6</sup> IU/m <sup>2</sup> | 0.29508197  |
| 21 | 0.045    | x 10 <sup>6</sup> IU/m <sup>2</sup> | 0.04687500  |
| 22 | 0.408    | x 10 <sup>6</sup> IU/m <sup>2</sup> | 0.10526316  |
| 23 | 0.62     | x 10 <sup>6</sup> IU/m <sup>2</sup> | 0.40000000  |
| 24 | 0.408    | x 10 <sup>6</sup> IU/m <sup>2</sup> | 0.03571429  |
| 25 | 0.317    | x 10 <sup>6</sup> IU/m <sup>2</sup> | 0.24324324  |
| 26 | 0.445    | x 10 <sup>6</sup> IU/m <sup>2</sup> | 0.39655172  |
| 27 | 0.045    | x 10 <sup>6</sup> IU/m <sup>2</sup> | 0.11111111  |
| 28 | 0.445    | x 10 <sup>6</sup> IU/m <sup>2</sup> | 0.21951220  |
| 29 | 0.045    | x 10 <sup>6</sup> IU/m <sup>2</sup> | 0.13725490  |
| 30 | 0.045    | x 10 <sup>6</sup> IU/m <sup>2</sup> | -0.01408451 |
| 31 | 0.737    | x 10 <sup>6</sup> IU/m <sup>2</sup> | 0.20338983  |

\$lowDose  
[1] 0.045

\$hiDose

```
[1] 1.5
```

```
$optimResult
```

```
$optimResult$par
```

```
[1] 0.045
```

```
$optimResult$value
```

```
[1] -10.36596
```

```
$optimResult$counts
```

```
function gradient
```

```
1 1
```

```
$optimResult$convergence
```

```
[1] 0
```

```
$optimResult$message
```

```
[1] "CONVERGENCE: NORM OF PROJECTED GRADIENT <= PGTOL"
```

```
$betaCovariance
```

```
          a          b          c
a 0.001393592 -0.01032456 0.02665438
b -0.010324561 0.12017825 -0.36559735
c 0.026654380 -0.36559735 1.19747318
```

```
$sigma
```

```
[1] 0.08653605
```

```
$f
```

```
function (dose, a, b, c)
```

```
{
```

```
  .expr1 <- b * dose
```

```
  .expr3 <- 1 + dose/c
```

```
  .expr7 <- c^2
```

```
  .expr8 <- dose/.expr7
```

```
  .expr10 <- .expr3^2
```

```
  .expr12 <- .expr1 * .expr8
```

```
  .value <- a + .expr1/.expr3
```

```
  .grad <- array(0, c(length(.value), 3L), list(NULL, c("a",  
    "b", "c")))
```

```
  .hessian <- array(0, c(length(.value), 3L, 3L), list(NULL,  
    c("a", "b", "c"), c("a", "b", "c")))
```

```
  .grad[, "a"] <- 1
```

```
  .grad[, "b"] <- dose/.expr3
```

```
  .hessian[, "b", "b"] <- 0
```

```

.hessian[, "b", "c"] <- .hessian[, "c", "b"] <- dose * .expr8/.expr10
.grad[, "c"] <- .expr12/.expr10
.hessian[, "c", "c"] <- -(.expr1 * (dose * (2 * c)/.expr7^2)/.expr10 -
.expr12 * (2 * (.expr8 * .expr3))/.expr10^2)
attr(.value, "gradient") <- .grad
attr(.value, "hessian") <- .hessian
.value
}

```

```

$g
function (dose, a, b, c)
{
.expr1 <- b * dose
.expr3 <- 1 + dose/c
.expr7 <- 1/c
.expr8 <- .expr1 * .expr7
.expr9 <- .expr3^2
.expr13 <- b * .expr7/.expr9
.value <- a + .expr1/.expr3
.grad <- array(0, c(length(.value), 1L), list(NULL, c("dose")))
.hessian <- array(0, c(length(.value), 1L, 1L), list(NULL,
c("dose"), c("dose")))
.grad[, "dose"] <- b/.expr3 - .expr8/.expr9
.hessian[, "dose", "dose"] <- -(.expr13 + (.expr13 - .expr8 *
(2 * (.expr7 * .expr3))/.expr9^2))
attr(.value, "gradient") <- .grad
attr(.value, "hessian") <- .hessian
.value
}

```

```

$Optimality
[1] "Det"

```

```

attr("class")
[1] "NextDose"

```

```

$cubic
$fit
Nonlinear regression model
model: y ~ f(dose, a, b, c, d)
data: data
      a      b      c      d
0.06705 0.39829 -0.23523 0.05729
residual sum-of-squares: 0.2099

```

```

Number of iterations to convergence: 1

```

Achieved convergence tolerance: 2.418e-16

\$model  
[1] "cubic"

\$fitSummary

Formula:  $y \sim f(\text{dose}, a, b, c, d)$

Parameters:

|   | Estimate | Std. Error | t value | Pr(> t ) |
|---|----------|------------|---------|----------|
| a | 0.06705  | 0.03643    | 1.840   | 0.0767 . |
| b | 0.39829  | 0.31052    | 1.283   | 0.2105   |
| c | -0.23523 | 0.58072    | -0.405  | 0.6886   |
| d | 0.05729  | 0.26557    | 0.216   | 0.8308   |

---

Signif. codes: 0 '\*\*\*' 0.001 '\*\*' 0.01 '\*' 0.05 '.' 0.1 ' ' 1

Residual standard error: 0.08818 on 27 degrees of freedom

Number of iterations to convergence: 1

Achieved convergence tolerance: 2.418e-16

\$dhat

0.08708264 0.43273202

\$dhatCov

|      | [,1]        | [,2]        |
|------|-------------|-------------|
| [1,] | 0.004337504 | 0.001994908 |
| [2,] | 0.001994908 | 0.014394161 |

\$CurrentDose

[1] 0.175

\$NextDose

[1] 0.3652248

\$target

[1] 0.1 0.2

\$data

|   | Group.1 | patid | baseTreg | dose  | time | treg | id | Dtreg    |
|---|---------|-------|----------|-------|------|------|----|----------|
| 1 | 1       | 1     | 5.4      | 0.040 | 7    | 5.4  | 1  | 0.000000 |
| 2 | 2       | 2     | 7.2      | 0.040 | 7    | 7.8  | 7  | 8.333333 |



|    |    |    |     |       |   |      |    |           |
|----|----|----|-----|-------|---|------|----|-----------|
| 3  | 3  | 3  | 7.0 | 0.160 | 7 | 7.9  | 8  | 12.857143 |
| 4  | 4  | 4  | 4.3 | 0.160 | 7 | 5.0  | 9  | 16.279070 |
| 5  | 5  | 5  | 8.7 | 0.600 | 7 | 9.9  | 10 | 13.793103 |
| 6  | 6  | 6  | 5.3 | 0.600 | 7 | 6.2  | 11 | 16.981132 |
| 7  | 7  | 7  | 4.3 | 1.000 | 7 | 6.1  | 12 | 41.860465 |
| 8  | 8  | 8  | 9.9 | 1.000 | 7 | 11.9 | 13 | 20.202020 |
| 9  | 10 | 10 | 7.0 | 1.500 | 7 | 8.8  | 15 | 25.714286 |
| 10 | 11 | 11 | 4.3 | 1.500 | 7 | 6.0  | 16 | 39.534884 |
| 11 | 12 | 12 | 6.5 | 0.620 | 7 | 8.4  | 17 | 29.230769 |
| 12 | 14 | 14 | 7.5 | 0.620 | 7 | 9.5  | 19 | 26.666667 |
| 13 | 15 | 15 | 4.4 | 0.440 | 7 | 5.0  | 20 | 13.636364 |
| 14 | 16 | 16 | 6.9 | 0.750 | 7 | 8.6  | 21 | 24.637681 |
| 15 | 17 | 17 | 6.6 | 0.045 | 7 | 7.8  | 22 | 18.181818 |
| 16 | 18 | 18 | 8.3 | 0.160 | 7 | 9.3  | 23 | 12.048193 |
| 17 | 19 | 19 | 4.8 | 0.045 | 7 | 5.4  | 24 | 12.500000 |
| 18 | 20 | 20 | 6.7 | 0.730 | 7 | 7.7  | 25 | 14.925373 |
| 19 | 21 | 21 | 8.1 | 0.045 | 7 | 8.6  | 26 | 6.172840  |
| 20 | 23 | 23 | 6.1 | 0.620 | 7 | 7.9  | 28 | 29.508197 |
| 21 | 24 | 24 | 6.4 | 0.045 | 7 | 6.7  | 29 | 4.687500  |
| 22 | 25 | 25 | 5.7 | 0.408 | 7 | 6.3  | 30 | 10.526316 |
| 23 | 26 | 26 | 3.5 | 0.620 | 7 | 4.9  | 31 | 40.000000 |
| 24 | 27 | 27 | 8.4 | 0.408 | 7 | 8.7  | 32 | 3.571429  |
| 25 | 28 | 28 | 7.4 | 0.317 | 7 | 9.2  | 33 | 24.324324 |
| 26 | 29 | 29 | 5.8 | 0.445 | 7 | 8.1  | 34 | 39.655172 |
| 27 | 30 | 30 | 6.3 | 0.045 | 7 | 7.0  | 36 | 11.111111 |
| 28 | 31 | 31 | 8.2 | 0.445 | 7 | 10.0 | 37 | 21.951220 |
| 29 | 32 | 32 | 5.1 | 0.045 | 7 | 5.8  | 38 | 13.725490 |
| 30 | 34 | 34 | 7.1 | 0.045 | 7 | 7.0  | 40 | -1.408451 |
| 31 | 35 | 35 | 5.9 | 0.737 | 7 | 7.1  | 41 | 20.338983 |

|    | dosetext |   |                                   | y          |
|----|----------|---|-----------------------------------|------------|
| 1  | 0.04     | x | 10 <sup>6</sup> IU/m <sup>2</sup> | 0.00000000 |
| 2  | 0.04     | x | 10 <sup>6</sup> IU/m <sup>2</sup> | 0.08333333 |
| 3  | 0.16     | x | 10 <sup>6</sup> IU/m <sup>2</sup> | 0.12857143 |
| 4  | 0.16     | x | 10 <sup>6</sup> IU/m <sup>2</sup> | 0.16279070 |
| 5  | 0.6      | x | 10 <sup>6</sup> IU/m <sup>2</sup> | 0.13793103 |
| 6  | 0.6      | x | 10 <sup>6</sup> IU/m <sup>2</sup> | 0.16981132 |
| 7  | 1        | x | 10 <sup>6</sup> IU/m <sup>2</sup> | 0.41860465 |
| 8  | 1        | x | 10 <sup>6</sup> IU/m <sup>2</sup> | 0.20202020 |
| 9  | 1.5      | x | 10 <sup>6</sup> IU/m <sup>2</sup> | 0.25714286 |
| 10 | 1.5      | x | 10 <sup>6</sup> IU/m <sup>2</sup> | 0.39534884 |
| 11 | 0.62     | x | 10 <sup>6</sup> IU/m <sup>2</sup> | 0.29230769 |
| 12 | 0.62     | x | 10 <sup>6</sup> IU/m <sup>2</sup> | 0.26666667 |
| 13 | 0.44     | x | 10 <sup>6</sup> IU/m <sup>2</sup> | 0.13636364 |
| 14 | 0.75     | x | 10 <sup>6</sup> IU/m <sup>2</sup> | 0.24637681 |
| 15 | 0.045    | x | 10 <sup>6</sup> IU/m <sup>2</sup> | 0.18181818 |
| 16 | 0.16     | x | 10 <sup>6</sup> IU/m <sup>2</sup> | 0.12048193 |

```

17 0.045 x 10^6 IU/m^2 0.12500000
18 0.73 x 10^6 IU/m^2 0.14925373
19 0.045 x 10^6 IU/m^2 0.06172840
20 0.62 x 10^6 IU/m^2 0.29508197
21 0.045 x 10^6 IU/m^2 0.04687500
22 0.408 x 10^6 IU/m^2 0.10526316
23 0.62 x 10^6 IU/m^2 0.40000000
24 0.408 x 10^6 IU/m^2 0.03571429
25 0.317 x 10^6 IU/m^2 0.24324324
26 0.445 x 10^6 IU/m^2 0.39655172
27 0.045 x 10^6 IU/m^2 0.11111111
28 0.445 x 10^6 IU/m^2 0.21951220
29 0.045 x 10^6 IU/m^2 0.13725490
30 0.045 x 10^6 IU/m^2 -0.01408451
31 0.737 x 10^6 IU/m^2 0.20338983

```

```

$lowDose
[1] 0.045

```

```

$hiDose
[1] 1.5

```

```

$optimResult
$optimResult$par
[1] 0.3652248

```

```

$optimResult$value
[1] -9.907959

```

```

$optimResult$counts
function gradient
      17      17

```

```

$optimResult$convergence
[1] 0

```

```

$optimResult$message
[1] "CONVERGENCE: REL_REDUCTION_OF_F <= FACTR*EPSMCH"

```

```

$betaCovariance
      a      b      c      d
a 0.001327400 -0.008560918 0.01333106 -0.00551340
b -0.008560918 0.096424759 -0.17522500 0.07721125
c 0.013331059 -0.175225002 0.33723847 -0.15283294
d -0.005513400 0.077211254 -0.15283294 0.07052876

```

```
$sigma  
[1] 0.08817558
```

```
$f  
function (dose, a, b, c, d)  
{  
  .expr3 <- dose^2  
  .expr6 <- dose^3  
  .value <- a + b * dose + c * .expr3 + d * .expr6  
  .grad <- array(0, c(length(.value), 4L), list(NULL, c("a",  
    "b", "c", "d")))  
  .hessian <- array(0, c(length(.value), 4L, 4L), list(NULL,  
    c("a", "b", "c", "d"), c("a", "b", "c", "d")))  
  .grad[, "a"] <- 1  
  .grad[, "b"] <- dose  
  .grad[, "c"] <- .expr3  
  .hessian[, "c", "c"] <- 0  
  .hessian[, "c", "d"] <- .hessian[, "d", "c"] <- 0  
  .grad[, "d"] <- .expr6  
  .hessian[, "d", "d"] <- 0  
  attr(.value, "gradient") <- .grad  
  attr(.value, "hessian") <- .hessian  
  .value  
}
```

```
$g  
function (dose, a, b, c, d)  
{  
  .expr3 <- dose^2  
  .expr9 <- 2 * dose  
  .value <- a + b * dose + c * .expr3 + d * dose^3  
  .grad <- array(0, c(length(.value), 1L), list(NULL, c("dose")))  
  .hessian <- array(0, c(length(.value), 1L, 1L), list(NULL,  
    c("dose"), c("dose")))  
  .grad[, "dose"] <- b + c * .expr9 + d * (3 * .expr3)  
  .hessian[, "dose", "dose"] <- c * 2 + d * (3 * .expr9)  
  attr(.value, "gradient") <- .grad  
  attr(.value, "hessian") <- .hessian  
  .value  
}
```

```
$Optimality  
[1] "Det"
```

```
attr("class")
```

[1] "NextDose"
