# Supplementary material for: Regulatory T Cell Responses in Participants with Type 1 Diabetes after a Single Dose of Interleukin-2: A Non-Randomised, Open Label, Adaptive Dose-Finding Trial
Source: PubMed Central journal article supplement (PMC5058548; doi:10.1371/journal.pmed.1002139), 2016-10-11
Supplement: pmed.1002139.s031.pdf [file pmed.1002139.s031.pdf]

**S1 Table. Antibody combinations for surface (tubes 1-6) and intra-cellular staining (tube 7)**

| Tube Numbers    |                 | 1             | 2      | 3            | 4      | 5      | 6      | 7             |
|-----------------|-----------------|---------------|--------|--------------|--------|--------|--------|---------------|
| Brilliant Stain |                 | 50            | 50     | 50           | 50     | 50     | 50     | 50            |
| Buffer          |                 |               |        |              |        |        |        |               |
| Fluorochrome    | APC             | CD25          | CD25   | CD25         | CD25   | CD25   | CD25   | CD25          |
|                 | AF700           | CD4           | CD4    | CD4          | CD4    | CD4    | CD4    | CD4           |
|                 | BV785           | CD45RA        | CD45RA | CD45RA       | CD45RA | CD45RA | CD45RA | CD45RA        |
|                 | PE/Cy7          | CD127         | CD127  | CD127        | CD127  | CD127  | -      | CD127         |
|                 | PerCP/Cy5.5     | CXCR3         | CXCR3  | CXCR3        | CXCR3  | CXCR3  | CD69   | KI67          |
|                 | BV421           | -             | -      | CCR4 (CD194) | -      | CCR7   | CD56   | -             |
|                 | PB              | HLADR         | HLADR  | -            | CD14   | -      | -      | FOXP3         |
|                 | FITC            | -             | -      | -            | -      | CD31   | TCRab  | HELIOS        |
|                 | AF488           | CCR6          | CCR6   | CCR6         | CCR6   | -      | -      | -             |
|                 | PE              | CTLA4 (CD152) | CD69   | CCR10        | IL6R   | CD122  | CD122  | CTLA4 (CD152) |
|                 | APC/Cy7         | CD8           | CD8    | CD8          | CD8    | CD8    | CD8    | CD8           |
|                 | eFluor605/BV605 | CD62L         | CD62L  | CD62L        | CD62L  | -      | CD161  | CD62L         |
| BV510           | -               | -             | -      | -            | CD3    | -      | -      |               |
