# Supplementary material for: Regulatory T Cell Responses in Participants with Type 1 Diabetes after a Single Dose of Interleukin-2: A Non-Randomised, Open Label, Adaptive Dose-Finding Trial
Source: PubMed Central journal article supplement (PMC5058548; doi:10.1371/journal.pmed.1002139), 2016-10-11
Supplement: pmed.1002139.s032.pdf [file pmed.1002139.s032.pdf]

**S2 Table. Detailed antibody/clone information**

| <b>Antibody</b> | <b>Fluorochrome</b>  | <b>Clone</b> | <b>Source</b> | <b>Catalogue no.</b> |
|-----------------|----------------------|--------------|---------------|----------------------|
| CCR10           | PE                   | *            | RD Systems    | FAB3478P             |
| CCR4 (CD194)    | Brilliant Violet 421 | IG1          | BD Bioscience | 562579               |
| CCR6 (CD196)    | Alexa Fluor 488      | G034E3       | BioLegend     | 353414               |
| CCR7            | Brilliant Violet 421 | G043H7       | BioLegend     | 353208               |
| CD122           | PE                   | *            | BD Bioscience | 554525               |
| CD122           | PE                   | TU27         | BioLegend     | 339006               |
| CD127           | PE-Cy7               | eBioRDR5     | eBioscience   | 25-1278-42           |
| CD14            | Pacific Blue         | M5E2         | BioLegend     | 301828               |
| CD161           | Brilliant Violet 605 | HP-3G10      | BioLegend     | 339915               |
| CD25            | APC                  | M-A251       | BD Bioscience | 555434               |
| CD25            | APC                  | 2a3          | BD Bioscience | 340907               |
| CD3             | Brilliant Violet 510 | OKT3         | BioLegend     | 317331               |
| CD31            | FITC                 | WM-59        | eBioscience   | 11-0319-42           |
| CD4             | Alexa Fluor 700      | RPA-T4       | BioLegend     | 300526               |
| CD45RA          | Brilliant Violet 785 | HI100        | BioLegend     | 304139               |
| CD45RA          | Pacific Blue         | HI100        | BioLegend     | 304123               |
| CD56            | Brilliant Violet 421 | HCD56        | BioLegend     | 318327               |
| CD56            | PE                   | HCD56        | BioLegend     | 318306               |
| CD62L           | Brilliant Violet 605 | DREG-56      | eBioscience   | 93-0629-42           |
| CD69            | PE                   | FN50         | BioLegend     | 310906               |
| CD69            | PerCP/Cy5.5          | FN50         | BioLegend     | 310926               |
| CD8             | APC/Cy7              | RPA-T8       | BioLegend     | 301016               |
| CXCR3           | PerCP/Cy5.5          | G025H7       | BioLegend     | 353714               |
| CXCR5           | Alexa Fluor 488      | RF8B2        | BD Bioscience | 558112               |
| GRANZYME A      | PE                   | CB9          | BioLegend     | 507206               |
| HLADR           | Pacific Blue         | L243         | BioLegend     | 307633               |
| ICOS            | PE                   | C398.4A      | BioLegend     | 313508               |
| IL-6Ra          | PE                   | UV4          | BioLegend     | 352804               |
| PD-1 (CD279)    | Pacific Blue         | EH12.2h7     | BioLegend     | 329916               |
| TCRab           | FITC                 | IP26         | BioLegend     | 306706               |
| CTLA4 (CD152)   | PE                   |              | BD Bioscience | 555853               |
| FOXP3           | Pacific Blue         | 259D         | BioLegend     | 320216               |
| KI67            | PerCP/Cy5.5          | B56          | BD Bioscience | 561284               |

\*Not noted by company
