# Supplementary material for: Regulatory T Cell Responses in Participants with Type 1 Diabetes after a Single Dose of Interleukin-2: A Non-Randomised, Open Label, Adaptive Dose-Finding Trial
Source: PubMed Central journal article supplement (PMC5058548; doi:10.1371/journal.pmed.1002139), 2016-10-11
Supplement: pmed.1002139.s033.pdf [file pmed.1002139.s033.pdf]

**S3 Table. Antibody combinations for cell sorting**

|                     |                        | Antibody        | Sorted Cell            |                          |                             |                          |
|---------------------|------------------------|-----------------|------------------------|--------------------------|-----------------------------|--------------------------|
|                     |                        |                 | TTreg<br>(Total T-reg) | MemTeff<br>(Mem central) | 62L-MTeff<br>(Mem effector) | NK-CD56<br>(CD56 bright) |
| <b>Fluorochrome</b> | <b>APC</b>             | CD25 (2 clones) | 4 x test volume        |                          |                             |                          |
|                     | <b>Pacific Blue</b>    | CD45RA          | 4 x test volume        |                          |                             |                          |
|                     | <b>PE</b>              | CD56            | 4 x test volume        |                          |                             |                          |
|                     | <b>PE/Cy7</b>          | CD127           | 4 x test volume        |                          |                             |                          |
|                     | <b>BV605/eFluor605</b> | CD62L           | 4 x test volume        |                          |                             |                          |
|                     | <b>FITC</b>            | TCRab           | 2.5 x test volume      |                          |                             |                          |
|                     | <b>AF700</b>           | CD4             | 4 x test volume        |                          |                             |                          |
