# Supplementary material for: Regulatory T Cell Responses in Participants with Type 1 Diabetes after a Single Dose of Interleukin-2: A Non-Randomised, Open Label, Adaptive Dose-Finding Trial
Source: PubMed Central journal article supplement (PMC5058548; doi:10.1371/journal.pmed.1002139), 2016-10-11
Supplement: pmed.1002139.s034.pdf [file pmed.1002139.s034.pdf]

**S4 Table. Antibody combinations and information for pSTAT5 assay**

| <b>Fluorochrome</b>    | <b>Antibody</b>    | <b>Clone</b> | <b>Supplier</b> |
|------------------------|--------------------|--------------|-----------------|
| <b>APC</b>             | CD25               | 2A3, M-A251  | BD Biosciences  |
| <b>AF700</b>           | CD4                | RPA-T4       | Biolegend       |
| <b>PE/Cy7</b>          | CD56               | HCD56        | Biolegend       |
| <b>PerCP/Cy5.5</b>     | CD3                | UCHT1        | Biolegend       |
| <b>PB</b>              | CD45RA             | HI100        | Biolegend       |
| <b>AF488</b>           | STAT5a<br>(pY7694) | 47           | BD Biosciences  |
| <b>PE</b>              | FoxP3              | 259D         | Biolegend       |
| <b>eFluor605/BV605</b> | CD8                | RPA-T8       | Biolegend       |
