# Supplementary material for: Regulatory T Cell Responses in Participants with Type 1 Diabetes after a Single Dose of Interleukin-2: A Non-Randomised, Open Label, Adaptive Dose-Finding Trial
Source: PubMed Central journal article supplement (PMC5058548; doi:10.1371/journal.pmed.1002139), 2016-10-11
Supplement: pmed.1002139.s035.pdf [file pmed.1002139.s035.pdf]

**S5 Table. Full blood counts baseline, day 1 and final visit**

|                             | Baseline (N=40)             | Day 1 (N=40)                | Final visit (N=38)          | Normal range    |
|-----------------------------|-----------------------------|-----------------------------|-----------------------------|-----------------|
|                             | Mean<br>(SE, Range)         | Mean<br>(SE, Range)         | Mean<br>(SE, Range)         |                 |
| WBC ( $10^9/l$ )            | 6.11<br>(0.40, 3.9-18.9)    | 5.61<br>(0.18, 3.4-8.6)     | 5.98<br>(0.27, 3.7-12.6)    | 4.00 - 11.00    |
| RBC ( $10^{12}/l$ )         | 4.75<br>(0.07, 3.96-5.66)   | 4.77<br>(0.07, 3.98-5.79)   | 4.74<br>(0.07, 3.98-5.90)   | 4.20 - 5.80     |
| Hb (g/l)                    | 145.53<br>(1.96, 109-164)   | 146.25<br>(2.03, 110-172)   | 145.26<br>(2.22, 105-173)   | 130.00 - 170.00 |
| Haematocrit (l/l)           | 0.43<br>(0.01, 0.34-0.49)   | 0.43<br>(0.01, 0.34-0.49)   | 0.42<br>(0.01, 0.32-0.51)   | 0.39 - 0.50     |
| MCV (fl)                    | 90.05<br>(0.76, 79.6-100.3) | 90.02<br>(0.79, 79.2-100.7) | 89.48<br>(0.79, 74.1-101.2) | 80.00 - 100.00  |
| MCH (pg)                    | 30.70<br>(0.29, 25.6-33.7)  | 30.75<br>(0.29, 25.5-34.1)  | 30.65<br>(0.29, 24-33.8)    | 27.00 - 32.00   |
| Platelets ( $10^9/l$ )      | 198.58<br>(5.59, 143-268)   | 199.02<br>(5.96, 142-272)   | 214.47<br>(7.89, 139-306)   | 150.00 - 400.00 |
| Neutrophils ( $10^9/l$ )    | 3.62<br>(0.36, 1.68-15.49)  | 3.30<br>(0.15, 1.82-5.12)   | 3.54<br>(0.24, 1.73-10.02)  | 2.00 - 8.00     |
| Lymphocytes<br>( $10^9/l$ ) | 1.78<br>(0.08, 0.95-3.84)   | 1.56<br>(0.06, 0.81-2.89)   | 1.79<br>(0.09, 0.86-3.21)   | 1.00 - 4.50     |
| Monocytes ( $10^9/l$ )      | 0.46<br>(0.03, 0.22-1.00)   | 0.44<br>(0.02, 0.23-0.76)   | 0.44<br>(0.02, 0.25-0.68)   | 0.10 - 0.80     |
| Eosinophils ( $10^9/l$ )    | 0.20<br>(0.02, 0.03-0.86)   | 0.25<br>(0.03, 0.03-0.95)   | 0.15<br>(0.01, 0.02-0.36)   | 0.00 - 0.40     |
| Basophils ( $10^9/l$ )      | 0.04<br>(0.00, 0.01-0.18)   | 0.04<br>(0.00, 0.01-0.12)   | 0.05<br>(0.01, 0.01-0.31)   | 0.00 - 0.30     |
