# Supplementary material for: Regulatory T Cell Responses in Participants with Type 1 Diabetes after a Single Dose of Interleukin-2: A Non-Randomised, Open Label, Adaptive Dose-Finding Trial
Source: PubMed Central journal article supplement (PMC5058548; doi:10.1371/journal.pmed.1002139), 2016-10-11
Supplement: pmed.1002139.s036.pdf [file pmed.1002139.s036.pdf]

**S6 Table. Clinical FACS analysis of TNBK assay at baseline, day 1, and final visit**

|                                         | Baseline (N=40)               | Day 1 (N=40)                   | Final visit (N=38)            | Normal range |
|-----------------------------------------|-------------------------------|--------------------------------|-------------------------------|--------------|
|                                         | Mean<br>(SE, Range)           | Mean<br>(SE, Range)            | Mean<br>(SE, Range)           |              |
| CD19 (%)                                | 12.63<br>(0.75, 4-26)         | 12.30<br>(0.71, 4-28)          | 13.76<br>(0.84, 6-30)         | --           |
| CD19 Total B Cells ( $\times 10^9/l$ )  | 0.23<br>(0.02, 0.07-0.57)     | 0.19<br>(0.01, 0.05-0.46)      | 0.25<br>(0.02, 0.06-0.62)     | 0.10 - 0.50  |
| CD3 (%)                                 | 77.00<br>(1.09, 58-89)        | 76.72<br>(1.09, 56-86)         | 76.11<br>(1.07, 61-88)        | --           |
| CD3 Total T Cells ( $\times 10^9/l$ )   | 1.44<br>(0.07, 0.76-3.18)     | 1.24<br>(0.06, 0.70-2.46)      | 1.41<br>(0.08, 0.7-2.74)      | 0.70 - 2.10  |
| CD4 (%)                                 | 46.40<br>(1.27, 21-61)        | 46.23<br>(1.42, 21-69)         | 47.68<br>(1.27, 35-67)        | --           |
| CD4 Total ( $\times 10^9/l$ )           | 0.87<br>(0.05, 0.47-2.08)     | 0.73<br>(0.03, 0.42-1.28)      | 0.88<br>(0.06, 0.48-1.77)     | 0.30 - 1.40  |
| CD56 (%)                                | 9.70<br>(0.77, 3-24)          | 10.5<br>(0.82, 5-27)           | 9.42<br>(0.70, 3-21)          | --           |
| CD56 Total NK Cells ( $\times 10^9/l$ ) | 0.17<br>(0.01, 0.04-0.42)     | 0.16<br>(0.01, 0.08-0.46)      | 0.16<br>(0.01, 0.06-0.34)     | 0.12 - 0.88  |
| CD8 (%)                                 | 28.30<br>(1.18, 18-59)        | 28.05<br>(1.29, 17-62)         | 26.24<br>(0.80, 17-40)        | --           |
| CD8 Total ( $\times 10^9/l$ )           | 0.53<br>(0.04, 0.26-1.48)     | 0.46<br>(0.04, 0.20-1.81)      | 0.48<br>(0.03, 0.19-0.90)     | 0.20 - 0.90  |
| Lymphocyte count ( $\times 10^9/l$ )    | 1.87<br>(0.09, 1.04-4.08)     | 1.62<br>(0.06, 0.89-2.93)      | 1.85<br>(0.10, 0.91-3.48)     | 1.00 - 2.80  |
| TREG (% CD4 T cells)                    | 6.54<br>(0.25, 3.5-10.7)      | 6.06<br>(0.25, 3-9.3)          | 6.61<br>(0.19, 4-8.8)         | --           |
| TREG Absolute ( $\times 10^9/l$ )       | 0.06<br>(0.00, 0.02-0.14)     | 0.04<br>(0.00, 0.02-0.09)      | 0.06<br>(0.00, 0.03-0.13)     | --           |
| TREG CD25 (MFI)*                        | 3881.75<br>(88.28, 2792-5814) | 4973.93<br>(165.56, 2981-8191) | 3640.16<br>(93.11, 2533-5548) | --           |

\*Mean fluorescence intensity
