# Supplementary material for: Regulatory T Cell Responses in Participants with Type 1 Diabetes after a Single Dose of Interleukin-2: A Non-Randomised, Open Label, Adaptive Dose-Finding Trial
Source: PubMed Central journal article supplement (PMC5058548; doi:10.1371/journal.pmed.1002139), 2016-10-11
Supplement: pmed.1002139.s037.pdf [file pmed.1002139.s037.pdf]

**S7 Table. Metabolic measures & Thyroid function tests at baseline and final visit**

|                             | Baseline |                            | Final visit |                           | Normal range  |
|-----------------------------|----------|----------------------------|-------------|---------------------------|---------------|
|                             | N        | Mean<br>(SE, Range)        | N           | Mean<br>(SE, Range)       |               |
| Insulin usage (units-bolus) | 27       | 13.5<br>(1.60, 0-30)       | 25          | 13.48<br>(1.71, 1-36)     | --            |
| Insulin usage (units-basal) | 40       | 14.54<br>(1.91, 0-64)      | 38          | 14.22<br>(1.94, 0-64)     | --            |
| SMBG (mmol/l)               | 39       | 9.57<br>(0.82, 2.9-27.6)   | 37          | 7.59<br>(0.39, 3.2-12.7)  | --            |
| Glucose (mmol/l)            | 40       | 10.05<br>(0.84, 2.7-27.7)  | 38          | 9.19<br>(0.62, 4-18.7)    | --            |
| HbA1C (mmol/l)              | 40       | 58.93<br>(3.52, 34-132)    | 38          | 55.37<br>(3.06, 36-123)   | 30.00-45.00   |
| C-peptide (pmol/l)          | 40       | 483.78<br>(55.44, 9-1350)  | 38          | 450.24<br>(48.38, 9-1130) | 174.00-960.00 |
| TSH (mU/l)                  | 40       | 2.82<br>(1.01, 0.45-40.4)  | 38          | 2.12<br>(0.29, 0.38-11.2) | 0.35-5.50     |
| T4 (pmol/l)                 | 40       | 15.38<br>(0.36, 10.5-21.7) | 38          | 15.32<br>(0.42, 10.8-21)  | 10.00-19.80   |
