# Supplementary material for: Regulatory T Cell Responses in Participants with Type 1 Diabetes after a Single Dose of Interleukin-2: A Non-Randomised, Open Label, Adaptive Dose-Finding Trial
Source: PubMed Central journal article supplement (PMC5058548; doi:10.1371/journal.pmed.1002139), 2016-10-11
Supplement: pmed.1002139.s038.pdf [file pmed.1002139.s038.pdf]

**S8 Table. Renal, bone and liver biochemistries at baseline and final visit**

|                            | Baseline |                           | Final visit (N=38)        | Normal range    |
|----------------------------|----------|---------------------------|---------------------------|-----------------|
|                            | N        | Mean<br>(SE, Range)       | Mean<br>(SE, Range)       |                 |
| Serum Sodium (mmol/l)      | 40       | 138.88<br>(0.42, 132-143) | 138.68<br>(0.30, 135-142) | 135.00 - 145.00 |
| Serum Potassium (mmol/l)   | 40       | 4.30<br>(0.04, 3.8-5)     | 4.29<br>(0.04, 3.8-4.8)   | 3.40 - 5.00     |
| Urea (mmol/l)              | 40       | 5.45<br>(0.18, 3.6-8.5)   | 5.56<br>(0.20, 3.4-9.3)   | 0.00 - 7.50     |
| Creatinine (μmol/l)        | 40       | 79.08<br>(2.40, 51-129)   | 74.90<br>(2.64, 30-115)   | 35.00 - 125.00  |
| Albumin (g/L)              | 40       | 40.60<br>(0.53, 33-49)    | 41.05<br>(0.56, 31-49)    | 60.00 - 51.00   |
| Calcium (mmol/L)           | 40       | 2.26 (0.01)               | 2.29 (0.01)               | --              |
| Corrected Calcium (mmol/L) | 40       | 2.21<br>(0.01, 2.05-2.39) | 2.23<br>(0.01, 2.1-2.4)   | 2.10 - 2.50     |
| T.Bilirubin (μmol/l)       | 40       | 10.70<br>(1.33, 4-54)     | 11.18<br>(1.53, 2-64)     | 0.00 - 17.00    |
| Alkaline Phosphatase (U/l) | 40       | 94.70<br>4.59, 54-171)    | 94.18<br>(5.69, 47-190)   | 30.00 - 135.00  |
| ALT (U/l)                  | 40       | 26.93<br>(1.84, 15-64)    | 24.16<br>(1.82, 10-59)    | 0.00 - 50.00    |
| AST (U/l)                  | 39       | 18.15<br>(0.67, 9-31)     | 19.29<br>(1.00, 9-44)     | 0.00 - 40.00    |
| Gamma GT (U/l)             | 40       | 22.60<br>(1.82, 9-69)     | 21.42<br>(1.67, 8-60)     | 0.00 - 51.00    |
