# Supplementary material for: Regulatory T Cell Responses in Participants with Type 1 Diabetes after a Single Dose of Interleukin-2: A Non-Randomised, Open Label, Adaptive Dose-Finding Trial
Source: PubMed Central journal article supplement (PMC5058548; doi:10.1371/journal.pmed.1002139), 2016-10-11
Supplement: pmed.1002139.s042.pdf [file pmed.1002139.s042.pdf]

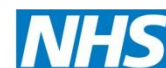

**Health Research Authority**  
**NRES Committee East of England - Cambridge Central**

The Old Chapel  
Royal Standard Place  
Nottingham  
NG1 6FS

Telephone: 01223 597685  
Facsimile: 01223 597645

05 March 2013

Dr Frank Waldron-Lynch  
Cambridge Institute for Medical Research, University of Cambridge  
Hills Road  
Cambridge  
CB2 0XY

Dear Dr Waldron-Lynch

**Study title:** Adaptive study of IL-2 dose on regulatory T cells in type 1 diabetes (DILT1D)  
**REC reference:** 13/EE/0020  
**Protocol number:** DILT1D  
**IRAS project ID:** 115333

Thank you for your letter of 19<sup>th</sup> February 2013. I can confirm the REC has received the documents listed below and that these comply with the approval conditions detailed in our letter dated 18 February 2013

**Documents received**

The documents received were as follows:

| <i>Document</i>                                    | <i>Version</i>         | <i>Date</i>      |
|----------------------------------------------------|------------------------|------------------|
| Covering Letter                                    | Dr Frank Waldron-Lynch | 19 February 2013 |
| Other: Patient Invitation Letter - clean           | 1.2                    | 19 February 2013 |
| Other: Patient Invitation Letter - tracked changes | 1.2                    | 19 February 2013 |

**Approved documents**

The final list of approved documentation for the study is therefore as follows:

| <i>Document</i>                    | <i>Version</i>                           | <i>Date</i>      |
|------------------------------------|------------------------------------------|------------------|
| Covering Letter                    | Dr Frank Waldron-Lynch                   | 17 December 2012 |
| Covering Letter                    | Dr Frank Waldron-Lynch                   | 19 February 2013 |
| Evidence of insurance or indemnity | University of Cambridge Finance Division | 30 November 2012 |
| GP/Consultant Information Sheets   | 1.0                                      | 06 December 2012 |

|                                                                                  |                        |                  |
|----------------------------------------------------------------------------------|------------------------|------------------|
| Investigator CV                                                                  | Dr Frank Waldron-Lynch | 10 December 2012 |
| Other: Participant card                                                          | 1.1                    | 27 November 2012 |
| Other: copy award letter from The Wellcome Trust                                 | Dr Emma Hudson         | 04 June 2010     |
| Other: Patient Information letter - clean                                        | 1.1                    | 01 February 2013 |
| Other: Patient Information letter - tracked changes                              | 1.1                    | 01 February 2013 |
| Other: Poster                                                                    | 1.1                    | 01 February 2013 |
| Other: Leaflet                                                                   | 1.1                    | 01 February 2013 |
| Other: details of the changes to the DILT1D Leaflet and Poster from V1.0 to V1.1 |                        |                  |
| Other: Patient Invitation Letter - clean                                         | 1.2                    | 19 February 2013 |
| Other: Patient Invitation Letter - tracked changes                               | 1.2                    | 19 February 2013 |
| Participant Consent Form: clean                                                  | 2.1                    | 01 February 2013 |
| Participant Consent Form: tracked                                                | 2.1                    | 01 February 2013 |
| Participant Information Sheet: clean                                             | 2.1                    | 01 February 2013 |
| Participant Information Sheet: tracked                                           | 2.1                    | 01 February 2013 |
| Protocol                                                                         | 2.0                    | 10 December 2012 |
| REC application                                                                  | 115333/395070/1/65     | 21 December 2012 |
| Response to Request for Further Information                                      | Dr Frank Waldron-Lynch | 04 February 2013 |

You should ensure that the sponsor has a copy of the final documentation for the study. It is the sponsor's responsibility to ensure that the documentation is made available to R&D offices at all participating sites.

**13/EE/0020**

**Please quote this number on all correspondence**

Yours sincerely



**Miss Nicky Storey**  
**Committee Co-ordinator**

E-mail: Nicky.Storey@eoe.nhs.uk

*Copy to: Mr Stephen Kelleher, Cambridge University Hospitals NHS Foundation Trust*
